# Supplementary material
Source: PubMed Central journal article supplement (PMC3600502)

## Supplementary Methods

### Table of Contents

|                                                                                  |    |
|----------------------------------------------------------------------------------|----|
| <b>Barcoded cDNA libraries for miRNA profiling by next-generation sequencing</b> |    |
| Materials .....                                                                  | 2  |
| Oligonucleotides .....                                                           | 2  |
| Enzymes .....                                                                    | 4  |
| Preparation of buffers and solutions .....                                       | 4  |
| Procedure .....                                                                  | 6  |
| The preparation and purification of the pre-adenylated 3' adapters .....         | 6  |
| Synthesis of adenosine-5'-phosphoimidazolide (ImpA) .....                        | 7  |
| Adenylation of 3' adapter oligodeoxynucleotides .....                            | 10 |
| Isolation of total RNA .....                                                     | 11 |
| Determination of total RNA concentration and quality .....                       | 14 |
| Preparation of calibrator oligoribonucleotide cocktail .....                     | 14 |
| Preparation of radioactive length markers .....                                  | 14 |
| 3'-adapter ligation .....                                                        | 15 |
| 5' adapter ligation .....                                                        | 18 |
| Reverse transcription (RT) .....                                                 | 19 |
| PCR amplification .....                                                          | 20 |
| PmeI digestion .....                                                             | 22 |
| Appendix .....                                                                   | 23 |
| Ordering of calibrator oligonucleotides .....                                    | 23 |
| Ordering of 3' adapter oligonucleotides .....                                    | 24 |
| Adenylation purification product concentration calculation and dilution .....    | 25 |
| <b>Supporting Information Legend</b> .....                                       | 27 |
| <b>Supplementary Table 1</b> .....                                               | 29 |
| <b>Supplementary Figure S1</b> .....                                             | 30 |
| <b>Supplementary Figure S2</b> .....                                             | 31 |
| <b>Supplementary Figure S3</b> .....                                             | 32 |
| <b>Supplementary Figure S4</b> .....                                             | 33 |
| <b>Supplementary Figure S5</b> .....                                             | 34 |

## Barcoded cDNA libraries for miRNA profiling by next-generation sequencing

### Materials

All reagents need to be RNase free. RNA samples should be stored at -20 °C or below and kept on ice while the reactions are being set up to minimize hydrolysis. Importantly, use siliconized tubes for all manipulations of small RNAs after the recovery of the 3' adapter ligation products, because oligonucleotides in the nanomolar concentration range readily adsorb to surfaces of non-siliconized tubes and pipette tips. For the same reason, mix reaction solutions by tapping the tube rather than pipetting up and down.

### *Oligonucleotides*

#### *Size marker oligoribonucleotides*

We add a trace amount of <sup>32</sup>P-end-labeled 19-nt and 24-nt size markers (in case you are cloning piRNAs use a 19-nt and 35-nt size markers) to the samples of total RNA to monitor the yield of adapter ligation and to guide the recovery of the expected length fraction of RNA ligation products.

| Size marker (nt) | Sequence 5' to 3'                   | Synthesis number |
|------------------|-------------------------------------|------------------|
| 19               | CGUACGCGGGUUUAAACGA                 | 19.39            |
| 24               | CGUACGCGGAAUAGUUUAAACUGU            | 24.60            |
| 35               | CUCAUCUUGGUCGUACGCGGAAUAGUUUAAACUGU | 35.131           |

The RNA size markers contain a PmeI restriction endonuclease recognition site (underlined). After PCR-amplification the cDNA libraries are digested with PmeI to avoid sequencing of the size markers.

#### *Calibrator oligoribonucleotide sequences*

The calibrator oligoribonucleotides have no match to the human or mouse genome. We recommend the addition of 0.5 fmol each of the ten following calibrator oligoribonucleotides to 2 µg of total RNA. The preparation of a calibrator cocktail requires the use of carrier oligonucleotide to prevent surface adsorption during preparation of the dilution series in the nanomolar concentration range (we use an 11-nt oligodeoxynucleotide, 5'-TCGAAGTATTC, synthesis number 11.6).

| Calibrator | Sequence                |
|------------|-------------------------|
| 01         | pGUCCCACUCCGUAGAUCUGUUC |
| 02         | pGAUGUAACGAGUUGGAAUGCAA |
| 03         | pUAGCAUAUCGAGCCUGAGAACA |
| 04         | pCAUCGGUCGAACUUAUGUGAAA |

|    |                          |
|----|--------------------------|
| 05 | pGAAGCACAUUCGCACAUCAUUAU |
| 06 | pUCUUAACCCGGACCAGAAACUA  |
| 07 | pAGGUUCCGGAUAAGUAAGAGCC  |
| 08 | pUAACUCCUUAAGCGAAUCUCGC  |
| 09 | pAAAGUAGCAUCCGAAAUACGGA  |
| 10 | pUGAUACGGAUGUUAUACGCAGC  |

p, 5'-monophosphate, sequences are RNA.

*Pre-adenylated 3' adapters for Illumina HiSeq sequencing*

We use the following set of 20 pre-adenylated 3' adapter oligodeoxynucleotides, each containing a unique pentamer barcode sequence at the 5' end (bold and underlined).

| 3' Adapter | Sequence                                          | Synthesis number |
|------------|---------------------------------------------------|------------------|
| 01         | rApp <b><u>TCACT</u></b> TCGTATGCCGTCTTCTGCTTG-L  | 26.75            |
| 02         | rApp <b><u>TCATC</u></b> TCGTATGCCGTCTTCTGCTTG-L  | 26.76            |
| 03         | rApp <b><u>TCCACT</u></b> TCGTATGCCGTCTTCTGCTTG-L | 26.77            |
| 04         | rApp <b><u>TCCGT</u></b> TCGTATGCCGTCTTCTGCTTG-L  | 26.78            |
| 05         | rApp <b><u>TCCTAT</u></b> TCGTATGCCGTCTTCTGCTTG-L | 26.79            |
| 06         | rApp <b><u>TCGAT</u></b> TCGTATGCCGTCTTCTGCTTG-L  | 26.80            |
| 07         | rApp <b><u>TCGCG</u></b> TCGTATGCCGTCTTCTGCTTG-L  | 26.81            |
| 08         | rApp <b><u>TCTAG</u></b> TCGTATGCCGTCTTCTGCTTG-L  | 26.82            |
| 09         | rApp <b><u>TCTCCT</u></b> TCGTATGCCGTCTTCTGCTTG-L | 26.83            |
| 10         | rApp <b><u>TCTGAT</u></b> TCGTATGCCGTCTTCTGCTTG-L | 26.84            |
| 11         | rApp <b><u>TTAAG</u></b> TCGTATGCCGTCTTCTGCTTG-L  | 26.85            |
| 12         | rApp <b><u>TAACG</u></b> TCGTATGCCGTCTTCTGCTTG-L  | 26.89            |
| 13         | rApp <b><u>TAATAT</u></b> TCGTATGCCGTCTTCTGCTTG-L | 26.90            |
| 14         | rApp <b><u>TAGAG</u></b> TCGTATGCCGTCTTCTGCTTG-L  | 26.91            |
| 15         | rApp <b><u>TAGGAT</u></b> TCGTATGCCGTCTTCTGCTTG-L | 26.92            |
| 16         | rApp <b><u>TATCAT</u></b> TCGTATGCCGTCTTCTGCTTG-L | 26.93            |
| 17         | rApp <b><u>TGATG</u></b> TCGTATGCCGTCTTCTGCTTG-L  | 26.94            |
| 18         | rApp <b><u>TGTGT</u></b> TCGTATGCCGTCTTCTGCTTG-L  | 26.95            |
| 19         | rApp <b><u>TTACAT</u></b> TCGTATGCCGTCTTCTGCTTG-L | 26.96            |
| 20         | rApp <b><u>TTGGT</u></b> TCGTATGCCGTCTTCTGCTTG-L  | 26.98            |

L, 3' aminolinker blocking group; rApp, 5' terminal adenosine residue connected via a 5',5'-diphosphate bridge to the 5'OH of the 5' nucleotide, which activates the adapter for ligation.

*Oligoribonucleotide 5'-adapter compatible with Solexa sequencing*

5' adapter: 5'-GUUCAGAGUUCUACAGUCCGACGAUC (synthesis number 26.68)

*Primers for amplification of the barcoded cDNA library*

| Primer | Sequence | Synthesis number |
|--------|----------|------------------|
|        |          |                  |

|               |                                                   |        |
|---------------|---------------------------------------------------|--------|
| 5'-<br>primer | AATGATACGGCGACCACCGACAGGTTTCAGAGTTCTACAGTCCG<br>A | 44.32  |
| 3'-<br>primer | CAAGCAGAAGACGGCATAACGA                            | 21.929 |

### ***Enzymes***

Enzymes related to small RNA sequencing should be found in the small RNA sequencing box unless otherwise noted.

- T4 polynucleotide kinase (PNK; NEB)
- T4 Rnl2(1-249)K227Q (NEB). The plasmid for expression of recombinant, His-tagged T4 Rnl2(1-249)K227Q can also be obtained from [www.addgene.org](http://www.addgene.org).
- T4 Rnl1 (Fermentas or NEB).
- SuperScript III reverse transcriptase (Invitrogen, 18080-051) -20 °C #2, shelf 4
- Taq polymerase
- PmeI (NEB) – available in small -20 °C

### ***Preparation of buffers and solutions***

#### 10x RNA Ligation buffer without ATP

- 0.5 M Tris-HCl, pH 7.6
- 0.1 M MgCl<sub>2</sub>
- 0.1 M 2-Mercaptoethanol
- 1 mg/ml Acetylated BSA (Sigma, B-8894)

In a 15 ml Falcon tube combine:

| Reagent or solution     | Final concentration | Volume (ml) |
|-------------------------|---------------------|-------------|
| 1 M Tris-HCl, pH 7.6    | 0.5 M               | 5           |
| 1 M MgCl <sub>2</sub>   | 0.1 M               | 1           |
| 2-Mercaptoethanol       | 0.1 M               | 0.07        |
| 20 mg/ml acetylated BSA | 1 mg/ml             | 1           |
| d.H <sub>2</sub> O      | N/A                 | 2.93        |

Aliquots of 500 µl should be available in -20 °C #2

#### 10x RNA Ligation buffer with ATP

- 0.5 M Tris-HCl, pH 7.6
- 0.1 M MgCl<sub>2</sub>
- 0.1 M 2-Mercaptoethanol
- 1 mg/ml Acetylated BSA (Sigma, B-8894)
- 2 mM ATP

In a 15 ml Falcon tube combine:

| Reagent or solution     | Final concentration | Volume (ml) |
|-------------------------|---------------------|-------------|
| 1 M Tris-HCl, pH 7.6    | 0.5 M               | 5           |
| 1 M MgCl <sub>2</sub>   | 0.1 M               | 1           |
| 2-Mercaptoethanol       | 0.1 M               | 0.07        |
| 20 mg/ml acetylated BSA | 1 mg/ml             | 1           |
| 100 mM ATP              | 2 mM                | 0.2         |
| MilliQ water            | N/A                 | 2.73        |

Aliquots of 500  $\mu$ L should be available in -20 °C #2

Denaturing PAA gel loading solution

- 98.8% Formamide
- 1% (v/v) 0.5 M Na<sub>2</sub>H<sub>2</sub>EDTA, pH 8.0
- 0.2% Bromophenol blue

Prepare solution volumetrically

5x TBE buffer

- 0.45 M Tris base
- 0.45 M Boric acid
- 10 mM Na<sub>2</sub>EDTA

In an 8 l plastic bottle (carboy), combine:

| Reagent or solution                    | Final concentration (M) | Mass (g) |
|----------------------------------------|-------------------------|----------|
| Tris Base                              | 0.45                    | 377.3    |
| Boric Acid                             | 0.45                    | 192.6    |
| Na <sub>2</sub> EDTA.2H <sub>2</sub> O | 0.01                    | 26.1     |

Fill up to 7 l mark with MilliQ water (see 7 l mark on carboy) and shake vigorously.  
Store at 25 °C.

Note: Using the above protocol, a dilution to 0.5X TBE may in other protocols be referred to as 1X TBE. We use 5X and 0.5X rather than 10X and 1X because 10X TBE precipitates at room temperature.

5x First strand buffer (supplied with SuperScript III)

- 250 mM Tris-HCl, pH 8.3
- 375 mM KCl
- 15 mM MgCl<sub>2</sub>
- 100 mM DTT

Note: RT kit may come with 10X buffer. Verify concentrations and adjust to 5X accordingly.

10x dNTP mix (please note that our 10x PCR buffer is only used 10x in PCR, but more concentrated during RT)

- 2 mM dATP
- 2 mM dCTP
- 2 mM dGTP
- 2 mM dTTP

In a 15 ml Falcon tube combine

| Reagent      | Final concentration (mM) | Volume ( $\mu$ l) |
|--------------|--------------------------|-------------------|
| 100 mM dATP  | 2                        | 280               |
| 100 mM dCTP  | 2                        | 280               |
| 100 mM dGTP  | 2                        | 280               |
| 100 mM dTTP  | 2                        | 280               |
| MilliQ water | N/A                      | 12.88 ml          |

Aliquot into eppendorfs and store in -20 °C #2, shelf 2

Note: A set of the four separate 100 mM dNTPs is available from GE Healthcare, product number 28-4065-52

10x PCR buffer

- 100 mM Tris-HCl, pH 8.0
- 500 mM KCl
- 1% Triton-X100
- 20 mM MgCl<sub>2</sub>
- 10 mM 2-Mercapthoethanol

In an autoclaved glass bottle combine:

| Reagent              | Final concentration (mM) | Volume (mL) |
|----------------------|--------------------------|-------------|
| 1 M Tris-HCl, pH 8.0 | 100                      | 10          |
| 2 M KCl              | 500                      | 25          |
| Triton-X-100         | 1%                       | 2           |
| β-Mercaptoethanol    | 10                       | 70 μl       |
| MilliQ water         | N/A                      | 62.98       |

Make multiple aliquots, some in 50 ml Falcon tubes, some in eppendorfs, and store them in -20 °C #2, shelf 2

5x Agarose gel loading solution

- 0.2% Bromophenol blue
- 0.2% Xylene cyanol FF
- 50 mM Na<sub>2</sub>H<sub>2</sub>EDTA, pH 8.0
- 20% Ficoll type 400

Bring to 10 ml with dH<sub>2</sub>O. Aliquot into 1 ml tubes, store at room temperature

25bp ladder

- 25 bp ladder (Invitrogen catalog number 10597011)
- 5 M NaCl
- TE buffer, pH 8
- 5X loading dye

In a 1.5 ml Eppendorf tube combine the following:

| Reagent or solution | Volume (μl) |
|---------------------|-------------|
| 25 bp ladder        | 50          |
| 5 M NaCl            | 1           |
| TE buffer, pH 8     | 350         |
| 5X loading dye      | 100         |

Aliquots of 100 μl should be available in -20 °C #2

**Procedure**

***The preparation and purification of the pre-adenylated 3' adapters***

3'-adapters are synthesized using a 3'-amino-modifier C7 CPG 500 (Glen Research cat. # 20-2957-10) support in order to assure that the adapter is blocked on the 3' end with aminolinker-modification. Adapters are also chemically phosphorylated on the 5' end so that they can be adenylated.

## *Synthesis of adenosine-5'-phosphoimidazolide (ImpA)*

### Reagents

- 5' AMP free acid (Sigma cat. # A2252)
- Triphenylphosphine (Aldrich cat. # T84409)
- 2,2'-Dipyridyldisulfide (aldrithiol-2, Aldrich cat. # 143049)
- Imidazole (molecular biology grade, Sigma cat. # I5513)
- Sodium perchlorate
- Anhydrous solvents: dimethylformamide, triethylamine, acetone, diethyl ether.

### ImpA synthesis procedure

Perform all experiments under a fume hood

1. Prepare two dry 50 ml round-bottom glass flasks. Flasks are dried overnight in a drying oven at 140 °C under vacuum. While the vacuum pump is still running, the oven is allowed to cool to room temperature and the vacuum is then released by shutting off the pump and venting the drying oven with argon from an argon tank. The flasks are then immediately sealed with rubber septa. Instead of a drying oven, one can also flame dry the flask using a Bunsen burner and chasing the hot humid air out by a constant argon flow from an argon-filled balloon connected to the flask by a needle through a rubber septum; a second needle is plucked into the septum to release the humid air and incoming argon. Once the humid air has been replaced by dry argon, the second needle is removed while the argon filled balloon remains connected while the flask is allowed to cool to room temperature.
2. Suspend 174 mg (0.5 mmol) of 5' AMP free acid in 15 ml of anhydrous dimethylformamide in one of the dried round-bottom flasks. Keep the flask closed with a rubber septum. The AMP will not dissolve entirely. Retain a 20  $\mu$ l aliquot of the AMP solution from the flask for subsequent thin layer chromatography (TLC) analysis (labeled as sample A).
3. In the other flask, dissolve 262 mg (1 mmol) of triphenylphosphine, 220 mg (1 mmol) of 2,2'-dipyridyldisulfide, and 170 mg (2.5 mmol) of imidazole in 15 ml of dimethylformamide and 0.9 ml (2.5 mmol) of triethylamine. Remove a 20  $\mu$ l aliquot and label as sample B. Keep sample under an argon balloon.
4. Add the AMP solution/suspension dropwise to the vigorously stirred triphenylphosphine-containing solution. Stir the reaction mixture for another 2.5 h at room temperature; keep the flask closed with the rubber septum. Remove a 20  $\mu$ l aliquot and label as sample C before proceeding to the next step. The 5'AMP from the DMF solution/suspension will dissolve completely and should turn to a clear yellow-green color.
5. Precipitate the ImpA by adding the reaction mixture dropwise into a thin and tall 500-ml beaker containing a vigorously stirred solution of 1.1 g (9 mmol) of sodium perchlorate, 110 ml acetone and 55 ml anhydrous diethyl ether. Precipitation will begin immediately and the solution will turn progressively cloudier as the entire reaction mixture is added.

6. Turn off the stirrer to allow the precipitate to settle to the bottom of the beaker. After approximately 1 h, decant as much as possible of the supernatant without perturbing the precipitate or use a large glass pipette connected to a pipetting aid to aspirate off the clear supernatant.

7. Once the volume has been reduced to about 40 ml, resuspend the precipitate in the residual supernatant and transfer to two 30 ml Corex glass centrifugation tubes. Rinse the beaker with small volumes (5 ml) of acetone and combine the wash solutions with the suspension already transferred to Corex tubes. Collect the precipitate by centrifugation at 5000 rpm (3,000xg) for 10 min.

8. Pour off the supernatant and wash the pellet twice by resuspending it with 20 ml acetone in the Corex tubes followed by 5 min centrifugation at 5000 rpm. The pellet should be white and the supernatant should be clear.

9. Resuspend the pellet in 10 ml diethylether and collect it again at 5000 rpm for 20 min. Pour off the ether supernatant. Seal the centrifugation tubes with a septum or parafilm and place 2 needles or poke small holes, so that the pellet in the tubes can be dried overnight under reduced pressure at 40 °C. After releasing the pressure by flushing the oven with argon, remove the needles so that the dry powder is protected from exposure to the air. If you are planning to use the ImpA reagent immediately, the drying procedure can be done overnight in the plastic desiccator. Seal the centrifugation tubes with parafilm and poke small holes. Place the centrifugation tubes in the plastic desiccator and introduce the vacuum. Leave overnight to dry. In the morning before detaching the desiccator from the vacuum, close the connection between the vacuum and desiccator (Figure 1) in order to prevent any air from coming in.

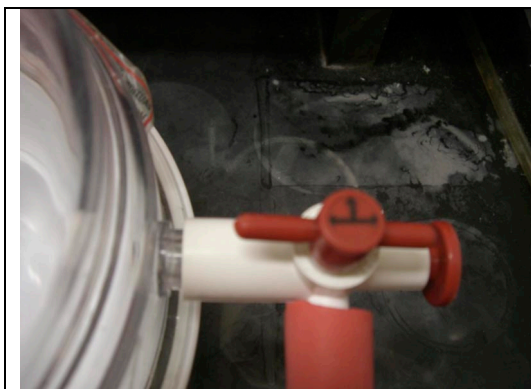

Fig. 1  
Closed desiccator valve

10. Connect the desiccator to an argon supply and fill the desiccator (Figure 2) to assure that dry pellets are under argon. Immediately proceed with adenylation steps.



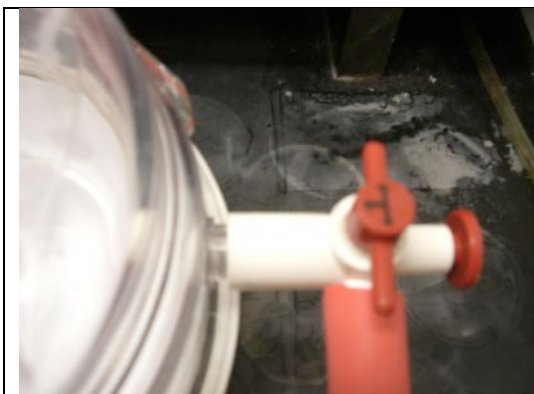

Fig. 2  
Open desiccator valve

11. The dried powder may be stored in a sealed bottle for up to one week at  $-80\text{ }^{\circ}\text{C}$  protected from humidity. The yield of ImpA is approximately 160 mg. The molecular weight of ImpA is 396.3 g/mol.

Quality control of synthesized ImpA

12. For quality control, spot 1  $\mu\text{l}$  AMP (sample A), unreacted mixture (sample B), and the mixture after 2.5 h reaction (sample C) on fluorescence-indicator coated Silica gel 60 pre-coated (TLC) plates (EMD, 5719-2).

13. Dry the plate with a hair dryer and develop the TLC in a chromatography chamber using isopropanol/water/25% ammonia (7/2/1) as solvent system. Develop the TLC until the solvent front is about 1 cm away from the top of the plate. Mark the solvent front with a pencil. Dry the plate with the hair dryer.

14. Visualize the spots at 254 nm with a UV hand lamp. The starting material should be completely consumed. With these conditions, the retention factors are 0.14 for AMP and 0.58 for ImpA (Figure 3).

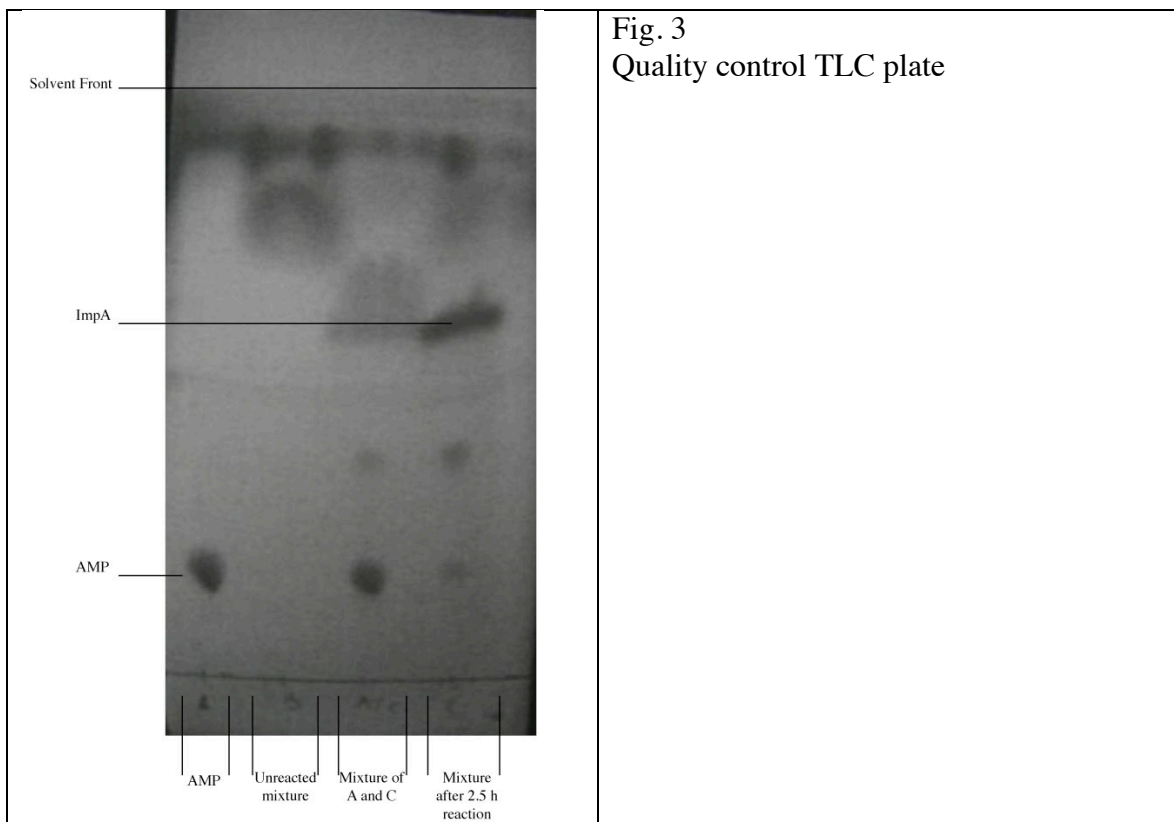

### ***Adenylation of 3' adapter oligodeoxynucleotides***

#### ***Reagents***

- Freshly prepared adenosine-5'-phosphoimidazolide (ImpA)
- 1 M MgCl<sub>2</sub>
- 5' phosphorylated 3' aminolinker-modified 3' adapter oligodeoxynucleotide, commercially available from oligonucleotide custom synthesis companies.

#### ***Adenylation procedure***

1. The protocol is given for a conversion of 50 nmol adapter. Dry down the equivalent of 50 nmol of 5' phosphorylated 3' adapter oligonucleotide solution in a 1.5 ml Eppendorf tubes in a Speedvac. A 100  $\mu$ l aliquot will take approximately 2 hours at 30 °C to Speedvac. Prepare 150  $\mu$ l of a solution containing 100 mM ImpA (MW 396.3 g/mol) and 50 mM MgCl<sub>2</sub>. Add 100  $\mu$ l of the ImpA/MgCl<sub>2</sub> solution to the dried down oligonucleotide. Incubate the solution at 50 °C for 1.5 h with shaking. Add the remaining 50  $\mu$ l of the ImpA/MgCl<sub>2</sub> solution and incubate for another 1.5 h at 50 °C with shaking. Add one volume (150  $\mu$ l) urea gel-loading solution (8 M urea, 50 mM EDTA, pH 8, 0.5 mg/ml bromophenol blue). Proceed to the next step or store the solution at -20 °C.

2. We recommend the use of sequencing size, preparative gels (40 cm x 25 cm x 1.5 mm, gel volume of 200 ml), to properly resolve the adenylated product from the non-adenylated adapter starting material. Pre-run the gel at 30 W for 1 h. Incubate sample at 90 °C for 1 min, keep at room temperature for 1 min, then load the material in two wells (150  $\mu$ l in each well) of an 8-well 20% polyacrylamide gel and run the gel for 9 h at 45 W until the bromophenol blue dye exits the bottom of the gel.

3. Dismantle the gel and wrap it in plastic film (e.g. Saran wrap). Place it onto a 254 nm fluorescence-indicator coated silica gel plate and visualize the oligodeoxynucleotides by shadowing with a 254 nm UV lamp (Figure 4).

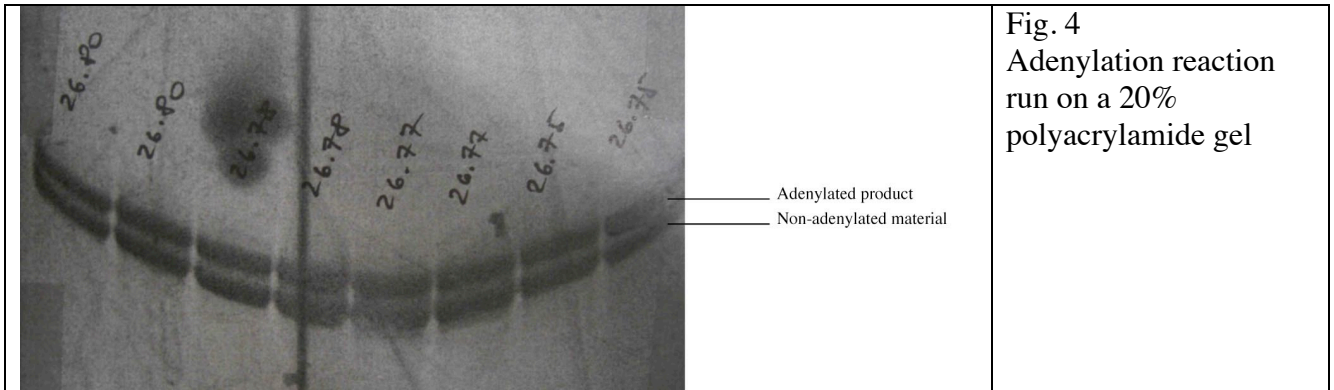

4. Mark the UV-absorbing dark bands, excise the product band and elute the adenylated oligodeoxynucleotide from the gel slices overnight at 4 °C in at least 3 volumes of 0.3 M NaCl. The intensity of the band corresponding to the adenylated product (top band) is similar to the intensity of the non-adenylated material (bottom band).

5. Precipitate the adenylated oligodeoxynucleotide by addition of 3 volumes of absolute ethanol and by incubation for at least 1 h at 0 °C or overnight at -20 °C.

6. Collect the pellet by centrifugation for 15 min at 4 °C (14,000xg). Dissolve the pellet in 30  $\mu$ l of water and determine the concentration by UV absorbance. The overall yield of the adenylation reaction is approximately 20%.

7. Adjust the concentration of the adenylated adapters to 50  $\mu$ M, because this is the concentration required for the miRNA profiling. See appendix for concentration measurement and dilution of adenylated product.

### ***Isolation of total RNA***

Total RNA is isolated from either freshly collected cultured cells or tissues, flash-frozen samples stored below -70 °C, or formalin-fixed tissues. As a rule of thumb, 1 mg of tissue or cells yields about 1  $\mu$ g of total RNA. We recommend isolation of total RNA from tissue or cultured cells either using the guanidinium isothiocyanate (GITC)/phenol method or commercial TRIzol (Invitrogen) reagent. Avoid aqueous LiCl precipitation, as small RNAs, including tRNAs, will not precipitate. Other protocols designed to enrich for small RNAs should also be avoided when calibrators are used to determine the ratio of miRNA to total RNA.

All reagents should be RNase free. RNA in solution is stored frozen at -20 °C or below and kept on ice while reactions are being set up to minimize hydrolysis.

Using the bar-coding approach, we recommend using 2  $\mu$ g of total RNA as starting material for small RNAs. The protocol we provide works well for isolating RNA from cultured cells and most tissues, though certain tissues, such as skin or fat, may require

special procedures for rupturing the tissue or dealing with unusual amounts of lipids, respectively.

#### Other Materials

- Siliconized 1.5 ml reaction tubes (BioPlas, 4165SL)
- QiaQuick gel extraction kit (Qiagen, 28704)
- TRIzol® reagent (Invitrogen)

#### Isolation of total RNA using self-made trizol reagent

1. Cultured cells are detached from the culture plate, collected by centrifugation for 5 min at 500xg at 4 °C and washed with phosphate-buffered saline (PBS). The cell pellet is resuspended in PBS and transferred to a pre-weighed 1.5 ml Eppendorf tube and centrifuged again for 5 min at 500xg. After removal of the supernatant, the weight of the cell pellet is determined. If RNA is extracted from tissue, determine the weight of the tissue slice. If you are isolating RNA from more than approximately 0.1-0.2 g of cells (expected yield about 0.1-0.2 mg total RNA) please adjust volumes and tube sizes.

2. Prepare the RNA extraction solution by mixing one volume of denaturing solution (4 M guanidinium isothiocyanate, 25 mM sodium citrate, 0.5% N-lauroylsarcosine, 50 mM 2-mercaptoethanol) with one volume of acidic water-saturated phenol, pH 4.3. Add 5 ml extraction solution per g of cells to the cell pellet. Transfer the viscous mixture immediately to the homogenizer and homogenize completely, keeping the sample on ice. Cells are easily homogenized using a Dounce glass homogenizer. Tissues are preferably homogenized using first a Polytron homogenizer (Kinematica), followed by douncing.

3. Add 1/10 volume of chloroform:isoamyl alcohol (24:1) and 1/20 volume of 2 M sodium acetate, pH 4.2 (the ratios of volume refer to the volume of extraction solution used in step 2). Homogenize the mixture by douncing as before until the mixture is turbid-white. Transfer the mixture to an Eppendorf tube and centrifuge for 5 min at 20,000xg. Typically a white interphase, composed of mostly DNA, forms between the lower organic and upper aqueous phase. Transfer the aqueous phase to a new tube with as little white interphase as possible. Extract with 1/2 volume of acid-buffered phenol:chloroform:isoamyl alcohol (25:24:1) and centrifuge. If necessary, repeat the extraction of the aqueous phase until there is no more white interphase and the aqueous phase remains clear. Finally, extract the aqueous phase once with 1/2 volume chloroform. Transfer the upper (aqueous) phase to a new tube.

4. Add 3 volumes of ethanol (volume relative to aqueous phase end of step 3) to precipitate the RNA for 1 h on ice or overnight at -20 °C. Collect the RNA pellet at 4 °C (15 min at 20,000xg) and remove the supernatant completely. Perform an additional 5 s centrifuge spin to collect residual liquid from the side of the tube, and then remove the residual liquid completely using a small pipette tip without perturbing the pellet. If the pellet is big and the supernatant liquid cannot be removed easily, rinse the pellet with 300 µl 75% ethanol, otherwise recover all liquid supernatant but don't wash pellet as it may detached from the tube wall and be lost by the wash. If you decide to wash the pellet, add the cold 75% ethanol, carefully invert the tube once to rinse the tube walls and then

collect the pellet by a 1 min spin at maximum speed. Remove the supernatant and dissolve the pellet in 100  $\mu$ l water or formamide. The wash removes the salt solution captured in a big pellet.

Isolation of total RNA using commercial trizol reagent

5.

- (a) Isolation from tissue:** When isolating RNA from tissue samples using TRIzol Reagent (Invitrogen, Cat. No. 15596-018), tissues are preferably homogenized using first a Polytron homogenizer (Kinematica), followed by douncing. Place tissue into siliconized 1.5 ml tube (we use BioPlas 1.5 ml PP tubes, cat. no. 4165SL). To homogenize 50-100 mg of tissue use 1 ml of TRIzol Reagent (the sample volume should not exceed 10% of the TRIzol Reagent used for homogenization).
- (b) Isolation from plasma:** Blood samples should be centrifuged at 500g (Sorvall Legend RT Rotor 75006441K) for 5 min. 500  $\mu$ l of plasma supernatant should be removed and placed in a 1.5 ml Eppendorf tube and centrifuged at 13,000 rpm (Sorvall Biofuge fresco) for 5 min. This will pellet residual cells and debris. Transfer 400  $\mu$ l of supernatant to a 2 ml Eppendorf tube. 1.2 ml of TRIzol LS was then added to the supernatant and the sample was vortexed. 320  $\mu$ l of chloroform was added to the vortexed sample and mixed. Total RNA was purified using the miRNEasy kit (Qiagen) by applying the aqueous phase following 15 min centrifugation at 12,000g (Sorvall Biofuge fresco) at 4 °C. Total RNA was eluted with 50  $\mu$ l of water into siliconized (low retention) microcentrifuge tubes (G-Tube Siliconized, Bio Plastic), dried using a speed-vacuum and resuspended in 11  $\mu$ l of water. RNA quantitation was performed using 1-2  $\mu$ l of eluted sample in the Qubit Fluorometric dye assay (Invitrogen). Proceed to step 12.

6. Incubate homogenized sample for 5 min at room temperature. Add 200  $\mu$ l of chloroform per 1 ml of TRIzol. Shake tube vigorously by hand for 15 s and incubate at room temperature for 2 to 3 min. Centrifuge the sample at 12,000xg for 15 min at 4 °C.

7. Transfer the aqueous phase to the fresh tube. Precipitate RNA by mixing the aqueous phase with isopropanol. Use 0.5 ml of isopropanol per 1 ml of TRIzol used for initial homogenization of the sample. Incubate samples at room temperature for 10 min and centrifuge at 12,000xg for 10 min at 4 °C.

8. Remove the supernatant and wash the pellet with 75% ethanol using 1 ml of ethanol per 1 ml of TRIzol used for initial homogenization of the tissue. Vortex the sample and centrifuge at 7,500xg for 5 min at 4 °C.

9. Remove the supernatant and briefly dry the RNA pellet. Do not dry the pellet completely because this would reduce the solubility of RNA. Dissolve the pellet in 100  $\mu$ l of water and store at -20 °C or lower temperature.

### ***Determination of total RNA concentration and quality***

10. Determine the concentration of the RNA by measuring the absorbance of a 1:100 dilution at 260 nm. If using a quartz cuvette with 1 cm diameter, the concentration  $c$  of total RNA (in  $\mu\text{g}/\mu\text{l}$ ) is roughly  $c = A(260 \text{ nm}) * f * 0.04 \mu\text{g}/\mu\text{l}$ ; whereby  $f$  is the dilution factor. The yield of total RNA should be about 1 mg per gram of tissue or cells, however, the yield may vary between different tissue types.

11. Control the quality of the RNA by separating 1  $\mu\text{g}$  on a 1.5% agarose gel using 0.5x TBE (45 mM Tris base, 45 mM boric acid, 1 mM  $\text{Na}_2\text{EDTA}$ ) buffer. If isolating RNA from eukaryotic cells the 28S and 18S rRNAs (5.0 and 1.9 kb, respectively) should be intact and visible as two sharp bands. Degradation will result in increased accumulation of rRNA and mRNA fragments in the library, obstructing the characterization of regulatory small RNAs.

### ***Preparation of calibrator oligoribonucleotide cocktail***

12. Prepare 7 ml of carrier solution containing 500 nM 11-nt carrier of DNA oligo 11.6 in water. The carrier is necessary to prevent surface adsorption during dilution and storage of low concentrations of calibrator RNA oligos.

13. Prepare 50  $\mu\text{l}$  of a calibrator cocktail containing 1  $\mu\text{M}$  of each calibrator RNA oligo.

14. Dilute the calibrator cocktail 1:10 in carrier solution resulting in a calibrator concentration of 0.1  $\mu\text{M}$  each (50  $\mu\text{l}$  calibrator solution plus 450  $\mu\text{l}$  of carrier).

15. Further dilute the calibrator cocktail dilution 1:100 in carrier solution resulting in a final RNA oligo calibrator concentration of 1 nM each (image 1).

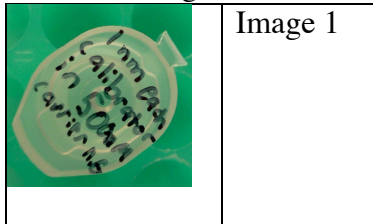

### ***Preparation of radioactive length markers***

Depending on whether you want to characterize miRNAs only or miRNAs and piRNAs, use 19-nt and 24-nt or 19-nt and 35-nt pairs of size markers, respectively. For simplicity, we will refer throughout the text to the 19-nt/24-nt pair only, which is more commonly used.

16. Radiolabel the size markers individually in a 10  $\mu\text{l}$  reaction containing 1  $\mu\text{M}$  RNA, 10 U T4 polynucleotide kinase and 50  $\mu\text{Ci}$  [ $\gamma$ - $^{32}\text{P}$ ]ATP (6,000 Ci/mmol) at 37 °C for 15 min.

17. Quench the reaction by addition of 10  $\mu\text{l}$  of denaturing PAA gel loading solution.

18. Incubate sample at 90 °C for 1 min.

19. Load 20  $\mu$ l samples in a single well on a 15% denaturing acrylamide (PAA) gel (15 cm wide, 17 cm long, 0.5 mm tick, 30 ml gel volume). Run the gel approx. 50 min at 30 W using 0.5x TBE buffer until the bromophenol blue dye is close to the bottom of the gel.
20. Dismantle the gel, leaving it mounted on one glass plate. Wrap the gel in plastic film (e.g. Saran wrap), place it in a cassette and against one corner of the glass plate to a corner of the cassette, align an X-ray film against the same corner and expose for 1 min; develop the film.
21. Align the gel on glass plate over X-ray film. Cut out the radioactive bands corresponding to the length marker and transfer the gel slices into pre-weighed 1.5 ml siliconized tubes (one for each marker). Also collect some weakly radioactive gel pieces from the gel running front and store in radioactive storage container. These pieces will be implanted later to facilitate alignment of gels with phosphorimager printouts.
22. Add 3 gel-piece volumes of 0.3 M NaCl and elute the RNA from the gel by incubating the tube overnight at 4 °C under constant agitation (on the thermomixer shaking at 11000 rpm).
23. Collect the supernatant and add 3 volumes of absolute ethanol (volume of ethanol is calculated based on the volume of 0.3 M NaCl used in step 22). Keep sample on ice for 1 h or overnight at -20 °C.
24. Collect the RNA as pellet by centrifugation in tabletop centrifuge at 4 °C at maximum speed (approx. 14,000 g) for 15 min.
25. Discard the supernatant. Collect residual ethanol by centrifugation at 14,000 g for 1 min. Air-dry the RNA pellet for 5 min.
26. Dissolve pellets in 10  $\mu$ l of water.
27. Combine 19-nt and 24-nt length marker solutions by diluting them 1:100 in water.

### ***3'-adapter ligation***

General important point: RNA secondary structure and sequence of RNA and adapters affects ligation efficiency. It is therefore important to follow precisely the temperatures and incubation times given during 3' and 5' adapter ligations and RT. Make sure, using a thermometer, that your heat blocks are at the correct temperature, don't trust displays or marked settings, keep a thermometer in your block during these steps. Heat shocks should be at 90 °C and for 1 min, etc. Once the reactions are complete and reactions are stopped, the temperature is no longer critical, i.e. heat-shocking a sample prior for loading is not as critical anymore.

28. Provide 2  $\mu$ g of total RNA in 8.5  $\mu$ l of water in a siliconized reaction tube. (When using periodate treated samples for piRNA cloning, you may increase the amount of total RNA to 20  $\mu$ g per sample. When barcoding is performed, note that the total amount of

RNA loaded on the separation gel may exceed its separation capacity, requiring the use of either more lanes or increasing the gel spacer size. After recovery of ligation products and 5' adapter ligation, the regular size gels can be used for separating the 5' adapter ligation product since the majority of RNA was removed on the first gel.)

29. Premix the following components. Multiply each volume by the number of samples being processed (up to 20 samples plus one control for combined 19-nt and 24-nt length marker). Prepare 10% extra of the required mastermix to allow for dispensing errors. Each 3'-adapter ligation reaction requires 2  $\mu$ l of 10x RNA ligase buffer without ATP, 6  $\mu$ l 50% aqueous DMSO, 0.5  $\mu$ l of 1 nM of each calibrator cocktail and 0.1  $\mu$ l of 1:100 dilution of the 5'-<sup>32</sup>P-labeled length marker oligoribonucleotide mix. Make certain the calibrator cocktail is at the proper concentration; should the concentration be too high, the calibrator marker becomes dominant in sequencing.

30. Add 8.6  $\mu$ l of the mastermix to each sample (for the length marker control reaction add mastermix to 8.5  $\mu$ l that contains 6.5  $\mu$ l of water and 2  $\mu$ l of the 1:100 diluted length marker oligoribonucleotide mix).

31. Add 2  $\mu$ l of 50  $\mu$ M adenylylated 3'-adapter with a unique barcode to each sample including the tube containing the 19- and 24-nt size markers, for which you may use again any of the adenylylated adapters before, since this sample won't be pooled.

32. Incubate the tube for 1 min at 90 °C to denature RNA and immediately place on ice for 2 min.

33. Add 1  $\mu$ l Rnl2(1-249)K227Q (1  $\mu$ g/ $\mu$ l), mix gently, and incubate overnight on ice in the cold room.

34. Add 3 times the total volume of the combined 3'-adapter ligation reactions of absolute ethanol (i.e. 1.32 ml ethanol for 20 samples) to the samples. In order to do this add 660  $\mu$ l of the 100% ethanol to one of the samples and 660  $\mu$ l to the other sample then combine the rest of the samples by adding 9 of them, one after another, to the tube containing the first sample and ethanol and other 9 by adding them to second tube that contains sample and ethanol. It is important not to mix samples together before the ethanol is added because ligase has to be inactivated in each sample, and that is achieved with ethanol. In this instance, it is imperative ethanol be added before NaCl in order to inactivate the enzyme and stop the reaction.

35. Add 20  $\mu$ l of 3 M NaCl to each tube that contains 10 samples and ethanol to achieve a final concentration of 0.3 M NaCl. Note that NaCl concentration is calculated solely based on the aqueous volume and excludes the volume of ethanol.

36. Precipitate the ligation products by incubation on ice for 1 h and collect the pellet by centrifugation in a tabletop centrifuge at 4 °C at maximum speed (approx. 14,000xg) for 30 min.



37. Discard the supernatant. Collect residual ethanol by centrifugation at 14,000xg for 10 s. Air-dry the RNA pellet for 5 min.

38. Use 10  $\mu$ l of water to dissolve each of the two RNA pellets representing 10 pooled RNA samples. Tap to mix, spin down. Combine the two 10  $\mu$ l samples into one tube for a final volume of 20  $\mu$ l representing a pool of all 20 RNA samples.

39. Add 20  $\mu$ l of denaturing PAA gel loading solution, incubate for 1 min at 90 °C and immediately load the samples in two adjacent wells (20  $\mu$ l of the sample in each well) in the center of a 20-well 15% denaturing PAA gel (15 cm x 17 cm x 0.5 mm, 30 ml gel volume; if the amount of total RNA is larger, consider using 1.5 mm spacers and 70 ml of gel solution or spreading the sample across more lanes). When processing more than one barcoded library (i.e. more than 20 individual small RNA samples at once), space samples by a two-well distance to avoid cross contamination. Load the length marker ligation reaction separated by one blank lane into the lanes flanking the leftmost and the rightmost of the samples loaded in the center of the gel.

40. Run the gel at 30 W for approximately 45 min in 0.5x TBE buffer until the bromophenol blue dye reaches the lower third of the gel. Do not run the gel much further in order to contain the ligation products within a gel area as small as possible for efficient elution.

41. Dismantle the gel, leaving it mounted on one glass plate.

42. To facilitate the alignment of the gel to the phosphorimager paper printout, excise small triangles (approx. 5 mm size) at three of the four corners of the gel and implant into each tiny radioactive gel pieces collected in step 21.

43. Wrap the gel in plastic film (e.g. Saran wrap) to avoid contamination and expose it to a phosphorimaging screen for 45 min (Figure 5).

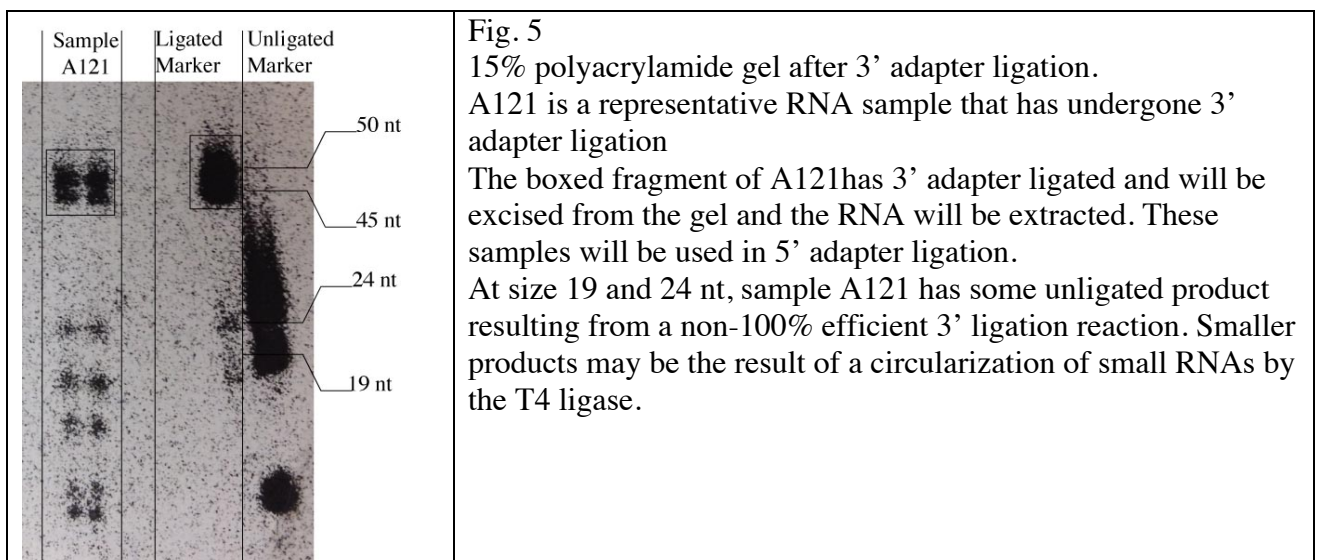

44. Print out a 100%-scaled image of the phosphorimaged gel, align the gel on top of the printout according to the positions of the three radioactive gel pieces. For gel excision in sample lanes, use the positions of the 19-nt/3' adapter and 24-nt/3' adapter (35-nt/3' adapter, when sequencing piRNAs) ligation products as margins. Transfer the gel piece(s) into a pre-weighed siliconized 1.5 ml tube. Also excise the ligation products for the length marker control and place into a separate tube.
45. Add 3 gel-piece volume of 0.3 M NaCl and elute the RNA from the gel by incubating the tube overnight at 4 °C under constant agitation (on the thermomixer shaking at 11000 rpm).
46. Collect the supernatant and precipitate the small RNAs by adding 3 volumes of ethanol to the collected supernatant (volume of ethanol is calculated based on the volume of 0.3 M NaCl used in step 45).
47. Precipitate the ligation products by incubation on ice for 1 h and collect the pellet by centrifugation in a tabletop centrifuge at 4 °C at maximum speed (approx. 14,000xg) for 30 min.
48. Discard the supernatant. Collect residual ethanol by centrifugation at 14,000xg for 10 s and discard the supernatant. Air-dry the RNA pellet for 5 min.

#### ***5' adapter ligation***

49. Dissolve the pellets in 9  $\mu$ l water. Carry forward also the control length marker ligation product.
50. Prepare a mastermix containing the following components per reaction: 1  $\mu$ l of 100  $\mu$ M 5'-adapter (26.68), 2  $\mu$ l of 10x RNA ligase buffer with ATP and 6  $\mu$ l 50% aqueous DMSO. Prepare 10% extra of the required cocktail to allow for dispensing errors. Add 9  $\mu$ l of this mixture to each sample.
51. Incubate the tube for 1 min at 90 °C to denature RNA and immediately place on ice for 2 min.
52. Add 2  $\mu$ l of T4 RNA ligase 1 (Rnl1) (1  $\mu$ g/ $\mu$ l), mix gently, and incubate for 1 h at 37 °C.
53. Add 20  $\mu$ l of denaturing PAA gel loading solution, incubate for 1 min at 90 °C and immediately load the samples in two adjacent wells (20  $\mu$ l of the sample in each well) of a 20-well 12% denaturing PAA gel (15 cm x 17 cm x 0.5 mm; 30 ml gel volume). When processing more than one barcoded library (i.e. more than 20 individual small RNA samples at once), space samples by a two-well distance to avoid cross contamination. Load the length marker ligation reaction separated by one blank lane into the lanes flanking the leftmost and the rightmost of the samples loaded in the center of the gel. Run the gel for 45 min at 30 W using 0.5x TBE buffer until the bromophenol blue dye is close to the bottom of the gel. Image the gel as described in steps [41](#) to 44 and excise the new

ligation product (Figure 6).

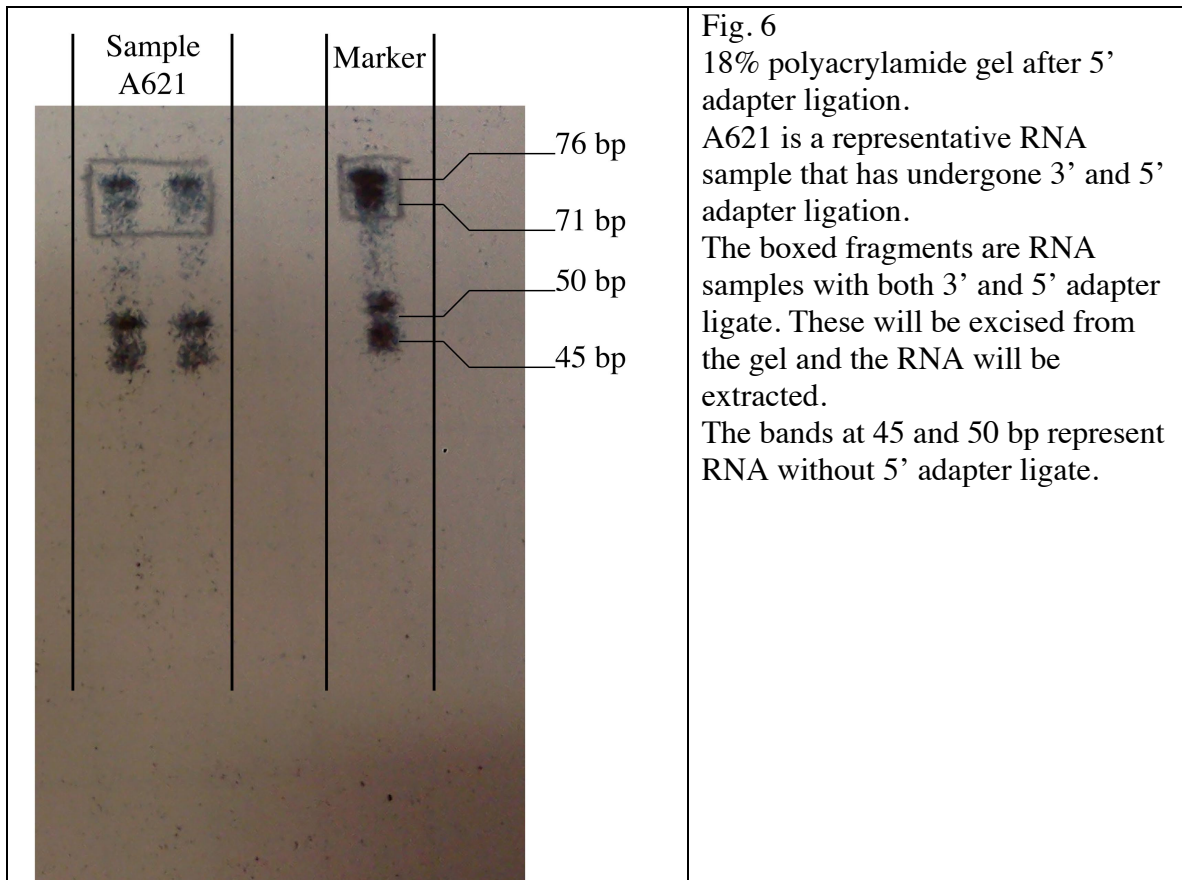

54. Add 3 gel-piece volumes of 0.3 M NaCl and 1  $\mu$ l of 100  $\mu$ M 3'-primer (21.929) as carrier and elute the ligated RNAs from the gel by incubating the tube overnight at 4  $^{\circ}$ C under constant agitation (on the thermomixer shaking at 11000 rpm). The 3'-primer facilitates the recovery of the ligation product and will be precipitated together with RNA and used in , transcription reaction.

55. Collect the supernatant and precipitate the small RNAs by adding 3 volumes of ethanol relative to the collected supernatant.

56. Precipitate the ligation products by incubation on ice for 1 h and collect the pellet by centrifugation in a tabletop centrifuge at 4  $^{\circ}$ C at maximum speed (approx. 14,000xg) for 30 min.

57. Discard the supernatant. Collect residual ethanol by centrifugation at 14,000xg for 10 s and discard the supernatant. Air-dry the RNA pellet for 5 min.

#### ***Reverse transcription (RT)***

58. Dissolve pellets in 5.6  $\mu$ l water. Carry forward also the control length marker ligation product.

59. Prepare an RT mastermix containing the following components per reaction: 1.5  $\mu\text{l}$  0.1 M DTT, 3  $\mu\text{l}$  5x first-strand buffer (provided by the manufacturer, but verify 5X vs 10X) and 4.2  $\mu\text{l}$  10 mM each dNTPs (check that dNTP concentration is for RT and not PCR). Prepare 10% extra of the required cocktail to allow for dispensing errors.

60. Denature the RNA by incubating the tube for 30 s at 90 °C and transfer the tube to a 50 °C incubator.

61. Add 8.7  $\mu\text{l}$  of the RT cocktail to each sample and incubate for 3 min at 50 °C. Add 0.75  $\mu\text{l}$  of Superscript III reverse transcriptase and incubate for 30 min at 42 °C.

62. To hydrolyze the RNA template, add 40  $\mu\text{l}$  of 150 mM KOH/20 mM Tris base and incubate for 10 min at 90 °C.

63. Neutralize the solution by addition of 40  $\mu\text{l}$  of 150 mM HCl and adjust the pH value to a range of 7.5 and 9.0. Monitor the pH change by spotting 1  $\mu\text{l}$  of cDNA solution on pH paper. The pH of the solution should be slightly alkaline to not inhibit the subsequent PCR.

### ***PCR amplification***

64. Prepare a PCR mix containing the following components per reaction: 10  $\mu\text{l}$  of the cDNA solution, 0.5  $\mu\text{M}$  of each primer (0.5  $\mu\text{M}$  of each primer in 100  $\mu\text{l}$  reaction is achieved by adding 0.5  $\mu\text{l}$  of each 100  $\mu\text{M}$  primer 21.929 and 44.32), 10  $\mu\text{l}$  10x dNTP mix, 10  $\mu\text{l}$  10x PCR buffer, 68  $\mu\text{l}$  water and 1  $\mu\text{l}$  of Taq DNA polymerase (5 U/ $\mu\text{l}$ ) to perform a standard 100  $\mu\text{l}$  PCR with Taq polymerase. Also perform a no-template control PCR reaction ( $\text{H}_2\text{O}$  instead of cDNA) to check for DNA contamination in the reaction mixture. Prepare enough mastermix to have four 100  $\mu\text{l}$  PCR reactions per sample. One PCR reaction will be a pilot PCR to determine how many cycles should be used to amplify the cDNA library. Once you determine the number of cycles needed per cDNA library, perform the large-scale amplification, which will contain three 100  $\mu\text{l}$  PCR reactions per cDNA library.

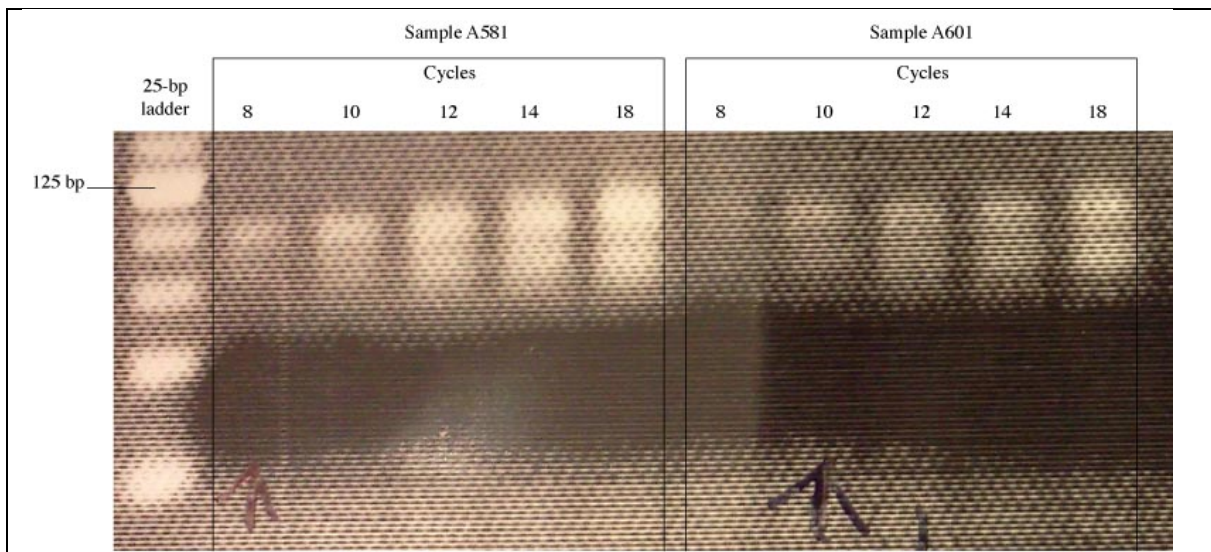

Fig. 7

Pilot PCR on 2.5% agarose gel

For representative sample A581, 8 PCR cycles would be used for the final amplification. For representative sample A601, 10 PCR cycles would be used for the final amplification. Desired PCR product runs around 90-95 bp on gel. 70 bp band is unwanted 3'-adapter-to-5' adapter ligation.

Negative control from final PCR cycle should also be run on gel. This should be perfectly clean; if any product appears, sample integrity has been compromised by contamination

65. Program the following cycle conditions: 45 s at 94 °C, 85 s at 50 °C, 60 s at 72 °C. Remove 12  $\mu$ l aliquots every other cycle following cycle number 8 by temporarily putting the PCR cycler on hold at the end of the 72 °C step. This is done to determine the necessary number of cycles for amplifying the cDNA library. In our experience, with a pool of 20 sample of 2  $\mu$ g input RNA, it is usually not necessary to amplify for more than 15 cycles.

66. Analyze the PCR products on a 2.5% agarose gel (Figure 7). These products might appear as a double band with a higher band running at the expected length of about 90-95 bp (90-106 bp when generating piRNA libraries) and a 70 bp band corresponding to 3'-adapter-to-5'-adapter ligation side products without insert. Carryover from unligated 3' adapter into the 5' adapter ligation reaction is responsible for this byproduct. Only the negative control from the final, 16<sup>th</sup>, PCR cycle needs to be run on agarose gel.

67. Define the optimal cycle number for cDNA amplification, which has to be within the exponential amplification phase of the PCR, i.e. approx. 5 cycles away from reaching the saturation level of PCR amplification. It is important to limit the PCR to the exponential phase, otherwise sequence-specific distortions will be introduced into the small RNA profiles, a process commonly referred to as clonal amplification.

68. Perform a 300  $\mu$ l PCR with the determined cycle number by distributing the volume over 3 PCR tubes. After the reaction, remove 5  $\mu$ l of PCR reaction, add 5  $\mu$ l agarose loading dye solution and verify the product formation on a 2.5% agarose gel. If the PCR product is visible, proceed to the next step, otherwise add a few cycles of PCR or repeat the pilot study and larger scale PCR.

69. Combine the aliquoted PCR products in a 1.5 ml tube, add 30  $\mu$ l of 3 M NaCl and extract with 330  $\mu$ l of phenol/chloroform and vortex for 20 s.

70. Separate phases by centrifugation at 14,000xg in a tabletop centrifuge for 2 min.

71. Take off the upper, aqueous phase and transfer to a new tube. Make sure not to take off the interphase where denatured proteins accumulate.

72. Re-extract the aqueous phase with 330  $\mu$ l of chloroform to remove residual phenol and vortex for 20 s, then separate phases by centrifugation at 14,000 g in a tabletop centrifuge for 2 min.

73. Take off the upper, aqueous phase and transfer to a new tube.
74. Add 1 ml of absolute ethanol and incubate on ice for 1 h or overnight at -20 °C.
75. Collect the pellet by centrifugation in a tabletop centrifuge at 4 °C at maximum speed (approx. 14,000xg) for 15 min.
76. Discard the supernatant. Collect residual ethanol by centrifugation at 14,000xg for 1 min. Remove all of the supernatant but do not dry the pellet as this will cause the DNA to denature. Immediately proceed to the next step.

### ***PmeI digestion***

This step cleaves PCR products originating from the radiolabeled length markers used during small RNA cDNA library preparation. Be careful not to denature the double-stranded PCR product before or during the PmeI digestion. Denaturation and subsequent re-annealing of a complex sequence pool will result in imperfect rehybridization and formation of DNA duplexes with internal bulges that might compromise PmeI digestion. As control, the PCR product obtained from the ligation of adapters to the marker oligonucleotides alone (marker control sample) must be digested completely.

77. Prepare a PmeI digestion cocktail containing the following components per reaction: 2  $\mu$ l 10x PmeI buffer (NEB), 0.2  $\mu$ l of 100x BSA (10 mg/ml, NEB), 17.3  $\mu$ l of water and 0.5  $\mu$ l (5 U) of PmeI (NEB).

78. Dissolve the DNA pellet in 20  $\mu$ l of the PmeI digestion mixture and incubate for at least 2 h at 37 °C. Do not vortex reaction vigorously or the enzyme will denature.

79. Next, to separate small RNA insert-containing adapter ligation products from shorter 5'-adapter-to-3'-adapter ligation side products, prepare a 2.5% agarose gel containing 0.4  $\mu$ g/ml of ethidium bromide. Add 20  $\mu$ l of agarose gel loading solution and load all of the restriction digest into two wells of the agarose gel, as well as the 25-bp DNA ladder in a separate well. Run the gel in 0.5 x TBE buffer for approximately 1.5 h at 180 V until the 25-bp ladder is sufficiently resolved.

80. Visualize the DNA in the gel using a 360 nm UV transilluminator and excise the upper band of approximately 90 to 95 bp (90-106 bp for piRNA libraries) in size. Avoid excising below 90 bp to make sure the 5'-to-3'-adapter ligation product is not recovered.

81. Transfer the gel slice to a pre-weighed 1.5 ml reaction tube and weigh it again. Elute the DNA from the gel using the QiaQuick gel extraction kit according to the manufacturer's instructions. Recover the DNA in 30  $\mu$ l of 1 x TE buffer.

82. After the elution, remove 5  $\mu$ l of the eluted product, add 5  $\mu$ l agarose loading dye solution and verify the product elution and removal of the 5'-to-3'-adapter ligation product on a 2.5% agarose gel. Load 25 bp DNA ladder in a separate well. Run the gel in 0.5 x TBE buffer for approximately 20 min at 180 V. Visualize the DNA in the gel using a 360 nm UV transilluminator (Figure 8).



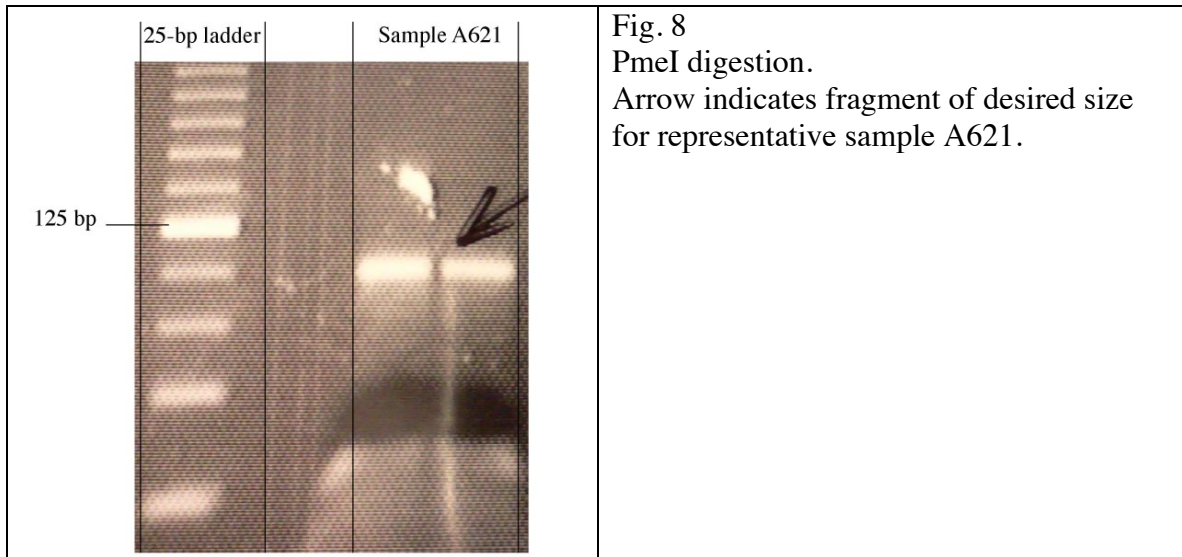

83. If there isn't any 5'-to-3'-adapter ligation product the DNA is submitted for Solexa sequencing. If you still have 5'-to-3'-adapter ligation product visible on the gel perform another gel purification.

**Troubleshooting:**

No PCR product: A) Adapter ligation failed. Take care to cool the reaction mixture after heat-shock and before addition of ligase. Rnl2(1-249)K227Q in particular is inactive at temperatures above 37 °C and may be irreversibly inactivated at higher temperatures. B) After precipitation, take care that residual ethanol is evaporated before addition of reaction mix, as residual ethanol will inhibit ligases and reverse transcriptases. C) Revisit reverse transcription. D) Periodate treatment to enrich for piRNAs dramatically reduces the amount of RNA able to ligate to adapters. More rounds of PCR may be needed in this case though it may appear as if RT failed.

No full-length, but only 5'-to-3'-adapter ligation products of 70 bp are visible after PCR: A) Make sure adapter concentrations in the ligation reactions are correct. B) Make sure to only excise ligation products between 19 and 24 nt (or 35 nt) length. Never cut below the 19 nt marker.

**Appendix**

***Ordering of calibrator oligonucleotides***

Calibrator oligonucleotide cocktails are kept in 10 μM and 1 μM stocks. Take from the 1 μM stock to create further dilutions as necessary for individual experiments. Should the 10 μM stock be exhausted, more oligonucleotides will be ordered from Dharmacom. See attached documents for manufacturer specifications.

cali\_2\_rc CGUCGAUUUAGACCGUAUAGCmC  
 cali\_24\_rc CUCGUCUCCGGCUGUAUUAUACmC  
 cali\_42\_rc UGCUAGUCCACGGGAGAAUAmU  
 cali\_8\_rc GGAUUACUCGGGUUUGAGACAmG  
 cali\_41\_rc GGAGCCGUGAAUACAUAUCCUAmG  
 cali\_38\_rc UUCCGCUUUACGGGUUUAUAGmA  
 cali\_39\_rc GGAGGAUACUUAUCCGCUUGmG  
 cali\_3\_rc GGUAUCCAACGUUGAUGGUUmU

**Product/Service Notes:**

- Custom RNA/Custom siRNA/Custom miRNA Synthesis:**
- Estimated turnaround time will be re-evaluated a second time and take effect at the time the order is placed
  - We provide no guarantee on estimated ship dates or product functionality for any custom synthesis

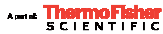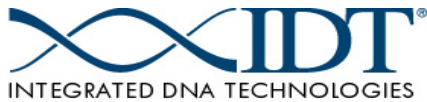

**Custom Quote**

**Quotation Summary**

Pricing Quote # 10162 applied.

| Item # | Sequence Name | Sequence                                  | Product Name      | Purification       | Yield Guarantee |
|--------|---------------|-------------------------------------------|-------------------|--------------------|-----------------|
| 1      | 26.75         | /5Phos/TCACCTCGTATGCCGCTCTCTG CTTG/3AmMO/ | 1 umole DNA oligo | Standard Desalting | 20 ODs          |
| 2      | 26.76         | /5Phos/TCATCTCGTATGCCGCTCTCTG CTTG/3AmMO/ | 1 umole DNA oligo | Standard Desalting | 20 ODs          |
| 3      | 26.77         | /5Phos/TCCACTCGTATGCCGCTCTCTG CTTG/3AmMO/ | 1 umole DNA oligo | Standard Desalting | 20 ODs          |
| 4      | 26.78         | /5Phos/TCCGTCGTATGCCGCTCTCTG CTTG/3AmMO/  | 1 umole DNA oligo | Standard Desalting | 20 ODs          |
| 5      | 26.79         | /5Phos/TCCTATCGTATGCCGCTCTCTG CTTG/3AmMO/ | 1 umole DNA oligo | Standard Desalting | 20 ODs          |
| 6      | 26.8          | /5Phos/TCGATCGTATGCCGCTCTCTG CTTG/3AmMO/  | 1 umole DNA oligo | Standard Desalting | 20 ODs          |
| 7      | 26.81         | /5Phos/TCGCGTCGTATGCCGCTCTCTG CTTG/3AmMO/ | 1 umole DNA oligo | Standard Desalting | 20 ODs          |
| 8      | 26.82         | /5Phos/TCTAGTCGTATGCCGCTCTCTG CTTG/3AmMO/ | 1 umole DNA oligo | Standard Desalting | 20 ODs          |
| 9      | 26.83         | /5Phos/TTCCTCGTATGCCGCTCTCTG CTTG/3AmMO/  | 1 umole DNA oligo | Standard Desalting | 20 ODs          |
| 10     | 26.84         | /5Phos/TCTGATCGTATGCCGCTCTCTG CTTG/3AmMO/ | 1 umole DNA oligo | Standard Desalting | 20 ODs          |
| 11     | 26.85         | /5Phos/TTAAGTCGTATGCCGCTCTCTG CTTG/3AmMO/ | 1 umole DNA oligo | Standard Desalting | 20 ODs          |
| 12     | 26.89         | /5Phos/TAAGTCGTATGCCGCTCTCTG CTTG/3AmMO/  | 1 umole DNA oligo | Standard Desalting | 20 ODs          |
| 13     | 26.9          | /5Phos/TAATATCGTATGCCGCTCTCTG CTTG/3AmMO/ | 1 umole DNA oligo | Standard Desalting | 20 ODs          |
| 14     | 26.91         | /5Phos/TAGAGTCGTATGCCGCTCTCT GCTTG/3AmMO/ | 1 umole DNA oligo | Standard Desalting | 20 ODs          |
| 15     | 26.92         | /5Phos/TAGGATCGTATGCCGCTCTCT GCTTG/3AmMO/ | 1 umole DNA oligo | Standard Desalting | 20 ODs          |
| 16     | 26.93         | /5Phos/TATCATCGTATGCCGCTCTCTG CTTG/3AmMO/ | 1 umole DNA oligo | Standard Desalting | 20 ODs          |
| 17     | 26.94         | /5Phos/TGATGTCGTATGCCGCTCTCTG CTTG/3AmMO/ | 1 umole DNA oligo | Standard Desalting | 20 ODs          |
| 18     | 26.95         | /5Phos/TGTGTCGTATGCCGCTCTCTG CTTG/3AmMO/  | 1 umole DNA oligo | Standard Desalting | 20 ODs          |
| 19     | 26.96         | /5Phos/TTACATCGTATGCCGCTCTCTG CTTG/3AmMO/ | 1 umole DNA oligo | Standard Desalting | 20 ODs          |
|        |               | /5Phos/TTGGTCGTATGCCGCTCTCTG              |                   |                    |                 |

**Ordering of 3' adapter oligonucleotides**  
 3' adaptor barcode oligonucleotides are purchased from IDT DNA. Their sequences are saved on the web site's order history (from 18 September 2012) along with our internal synthesis reference numbers. Should stock's get low, notify Danny and more can be ordered. See attached documents for manufacturer specifications.



***Adenylation purification product concentration calculation and dilution***

After getting the A260, A280, and A330 readings to make sure your sample is clean, do the following:

***Concentration calculation***

Use Beer's law:  $A(260) = C \times \epsilon \times b$

C = concentration (M)

$\epsilon$  = extinction coefficient ( $M^{-1}cm^{-1}$ )

b = length light travels through cuvette (cm)

Rearranging Beer's law

$$C = (A)/(\epsilon \times b)$$

f = dilution factor

Example calculation for 3' adapter 26.79:  
Spectrophotometer measured  $A_{260} = 0.599$  and dilution factor is 150  
 $C = ((0.599)/(240,100 \text{ M}^{-1}\text{cm}^{-1} \times 1 \text{ cm})) \times 150 = 0.000374219 \text{ M} = 374.219 \mu\text{M}$

See adjacent table for extinction coefficients.  
Note that vales are given for 5' adenylated adapter sequences, as that is the sample that's concentration is being measured.

Dilution calculation

$$M_1V_1=M_2V_2$$

Example for 26.70 continued:

$$(M_1V_1)/M_2=V_2$$

Using an initial volume of 25  $\mu\text{l}$  and a desired final concentration of 50  $\mu\text{M}$ :

$$(374.219 \mu\text{M} \times 25 \mu\text{l}) / 50 \mu\text{M} = 187.1 \mu\text{l}.$$

The desired final volume of 187.1  $\mu\text{l}$  would be obtained by adding 162.1  $\mu\text{l}$  of water to the initial 25  $\mu\text{l}$  sample.

| 5' Adapter | Extinction coefficient ( $\text{M}^{-1}\text{cm}^{-1}$ ) |
|------------|----------------------------------------------------------|
| 26.75      | 238500                                                   |
| 26.76      | 239500                                                   |
| 26.77      | 237600                                                   |
| 26.78      | 237400                                                   |
| 26.79      | 240100                                                   |
| 26.8       | 242800                                                   |
| 26.81      | 238800                                                   |
| 26.82      | 243600                                                   |
| 26.83      | 233300                                                   |
| 26.84      | 242200                                                   |
| 26.85      | 248400                                                   |
| 26.89      | 247100                                                   |
| 26.9       | 251700                                                   |
| 26.91      | 251600                                                   |
| 26.92      | 251000                                                   |
| 26.93      | 246300                                                   |
| 26.94      | 245700                                                   |
| 26.95      | 241200                                                   |
| 26.96      | 245300                                                   |
| 26.98      | 240600                                                   |

## Supporting Information Legend

### Table S1

Complete small RNA annotation statistics and RNA spike contribution in the study samples.

### Table S2

Corresponding numerical data for data shown in heatmaps.

### Fig. S1

Complete heatmap of hierarchically clustered samples according to miRNA precursor group profiles.

### Fig. S2

**Mir-498 is abundantly and specifically expressed in placenta.** Expression of miR-498 precursor group across samples showing relative expression levels normalized to total miRNA count per sample. Data from a published expression atlas (38).

### Fig. S3

**Placental, fetal and maternal miRNAs are closely related to each other but distantly related to non-pregnant women and paternal samples.** Distance matrix of miRNA profiles using Euclidean distance metric. Red represents a close distance while yellow indicates a further distance. Numeric values are shown to supplement manuscript Fig. 2.

**Fig. S4**

**Suggested ontology for the most abundant miRNA clusters found in plasma and the relative contribution of each miRNA cluster to total plasma miRNAs.** The most prominent feature (tissue of origin or biological process) for the abundant plasma miRNA clusters is indicated, along with average percentage contribution of that miRNA cluster to the total pool of plasma miRNAs. The fractional (log<sub>2</sub>) contribution of each cluster to each sample source (father, mother or fetal) is indicated with a purple square, red circle or green triangle, respectively.

**Fig. S5**

**miRNA expression in red blood cells.**

Heatmap of miRNA expression (log<sub>2</sub> of normalized read counts) in RNA extracted from red blood cells of 2 volunteers following Ficoll separation of EDTA-preserved whole blood. Shown are miRNA contributing to the cumulative top 90% of reads.

Supplementary Table 1. Complete small RNA annotation statistics and RNA spike contribution in the study samples.

| Samples   |             | Extraction statistics sample        |                            |              |                  | Small RNA annotation categories* excl. calib. (miRNA reads based on mapping to miRNA precursor) |                        |         |         |        |        |        |            |              |         | miRNA   |             |                  |                  |         |
|-----------|-------------|-------------------------------------|----------------------------|--------------|------------------|-------------------------------------------------------------------------------------------------|------------------------|---------|---------|--------|--------|--------|------------|--------------|---------|---------|-------------|------------------|------------------|---------|
| Unique ID | Sample Name | Sample Description                  | Total reads (incl. calib.) | Unique reads | Calibrator reads | % Calibrator reads                                                                              | Human and viral miRNAs | % miRNA | rRNA    | % rRNA | iRNA   | % iRNA | sn/ snoRNA | % sn/ snoRNA | Other   | % Other | read counts | % of total reads | [Paasari] of RNA | fmol/mg |
| 1         | M1          | Mother's blood from Set #1          | 1461557                    | 242325       | 8180             | 0.6%                                                                                            | 1144456                | 78.7%   | 33271   | 2.3%   | 34800  | 2.4%   | 2040       | 0.1%         | 238808  | 16.4%   | 1144456     | 78.7%            | 875              | 35.0    |
| 2         | M2          | Mother's blood from Set #2          | 924889                     | 172060       | 14361            | 1.6%                                                                                            | 695641                 | 75.3%   | 22019   | 2.4%   | 24109  | 2.6%   | 1339       | 0.1%         | 177520  | 19.5%   | 695641      | 75.3%            | 300              | 11.9    |
| 3         | M3          | Mother's blood from Set #3          | 704769                     | 156603       | 12846            | 1.8%                                                                                            | 475328                 | 68.7%   | 17339   | 2.5%   | 27456  | 4.0%   | 902        | 0.1%         | 170981  | 24.7%   | 475328      | 68.7%            | 225              | 9.3     |
| 4         | M6          | Mother's blood from Set #6          | 7463150                    | 698643       | 564532           | 7.8%                                                                                            | 5186084                | 75.4%   | 297433  | 4.3%   | 141226 | 2.1%   | 12111      | 0.2%         | 1239741 | 18.0%   | 5186084     | 75.4%            | 375              | 22.2    |
| 5         | M8          | Mother's blood from Set #8          | 3152642                    | 545369       | 675011           | 21.4%                                                                                           | 1336587                | 53.9%   | 133508  | 5.4%   | 148191 | 6.0%   | 9314       | 0.4%         | 849993  | 34.3%   | 1336587     | 53.9%            | 100              | 5.0     |
| 6         | M10         | Mother's blood from Set #10         | 4115354                    | 632382       | 898468           | 21.6%                                                                                           | 1529274                | 47.4%   | 379598  | 11.8%  | 236654 | 7.3%   | 19754      | 0.6%         | 1062013 | 32.9%   | 1529274     | 47.4%            | 75               | 4.3     |
| 7         | M12         | Mother's blood from Set #12         | 862993                     | 175740       | 274366           | 31.8%                                                                                           | 247898                 | 42.1%   | 44448   | 7.6%   | 19772  | 3.4%   | 1806       | 0.3%         | 272288  | 48.6%   | 247898      | 42.1%            | 75               | 2.3     |
| 8         | B1          | Umbilical cord blood from Set #1    | 1359484                    | 130111       | 9771             | 0.7%                                                                                            | 1184912                | 88.1%   | 13889   | 1.0%   | 13845  | 1.0%   | 1791       | 0.1%         | 131276  | 9.8%    | 1184912     | 88.1%            | 1550             | 30.3    |
| 9         | B2          | Umbilical cord blood from Set #2    | 570482                     | 81611        | 9529             | 1.7%                                                                                            | 459593                 | 81.3%   | 9652    | 1.7%   | 10356  | 1.8%   | 694        | 0.1%         | 84298   | 15.0%   | 459593      | 81.3%            | 500              | 12.0    |
| 10        | B3          | Umbilical cord blood from Set #3    | 1280465                    | 138546       | 10094            | 0.8%                                                                                            | 1090103                | 87.2%   | 16050   | 1.3%   | 14428  | 1.2%   | 1149       | 0.1%         | 128641  | 10.0%   | 1280465     | 87.2%            | 675              | 27.0    |
| 11        | B4          | Umbilical cord blood from Set #4    | 1605555                    | 151094       | 15519            | 1.0%                                                                                            | 1394689                | 87.7%   | 14128   | 0.9%   | 20433  | 1.3%   | 1222       | 0.1%         | 159564  | 10.0%   | 1605555     | 87.7%            | 825              | 22.5    |
| 12        | B6          | Umbilical cord blood from Set #6    | 11622431                   | 300880       | 698958           | 6.0%                                                                                            | 10228091               | 93.6%   | 52849   | 0.5%   | 30911  | 0.3%   | 14371      | 0.1%         | 597215  | 5.5%    | 10228091    | 93.6%            | 3850             | 36.6    |
| 13        | B7          | Umbilical cord blood from Set #7    | 8502857                    | 112840       | 316700           | 3.7%                                                                                            | 8064841                | 98.5%   | 15940   | 0.2%   | 13900  | 0.2%   | 7078       | 0.1%         | 83603   | 1.0%    | 8064841     | 98.5%            | 319000           | 25.2    |
| 14        | B8          | Umbilical cord blood from Set #8    | 13392447                   | 1561900      | 911780           | 6.8%                                                                                            | 4291113                | 34.5%   | 1817837 | 14.6%  | 283911 | 2.3%   | 27059      | 0.2%         | 6020760 | 48.4%   | 4291113     | 34.5%            | 380              | 11.8    |
| 15        | B10         | Umbilical cord blood from Set #10   | 4456395                    | 337320       | 394301           | 8.6%                                                                                            | 3451453                | 84.8%   | 89175   | 2.2%   | 61450  | 1.5%   | 10201      | 0.3%         | 469806  | 11.3%   | 3451453     | 84.8%            | 1101             | 22.5    |
| 16        | B11         | Umbilical cord blood from Set #11   | 2289555                    | 62309        | 364469           | 16.1%                                                                                           | 1843595                | 96.8%   | 7875    | 0.4%   | 9397   | 0.5%   | 2223       | 0.1%         | 41344   | 2.2%    | 1843595     | 96.8%            | 63250            | 126.5   |
| 17        | B12         | Umbilical cord blood from Set #12   | 5728350                    | 582793       | 973291           | 28.1%                                                                                           | 960402                 | 34.9%   | 362914  | 13.2%  | 172609 | 6.3%   | 14908      | 0.5%         | 1244645 | 45.2%   | 5728350     | 34.9%            | 75               | 2.5     |
| 18        | F1          | Father's blood from Set #1          | 1115178                    | 89194        | 8075             | 0.7%                                                                                            | 981143                 | 88.9%   | 8749    | 0.8%   | 6357   | 0.6%   | 1292       | 0.1%         | 105959  | 9.6%    | 981143      | 88.9%            | 750              | 30.4    |
| 19        | F6          | Father's blood from Set #6          | 2178003                    | 382306       | 383039           | 17.6%                                                                                           | 1122571                | 62.5%   | 80610   | 4.5%   | 42870  | 2.4%   | 5296       | 0.3%         | 543588  | 30.3%   | 2178003     | 62.5%            | 100              | 7.3     |
| 20        | F10         | Father's blood from Set #10         | 3074738                    | 514689       | 392819           | 12.9%                                                                                           | 1407053                | 52.5%   | 171566  | 6.4%   | 51608  | 1.9%   | 5723       | 0.2%         | 1042549 | 38.9%   | 3074738     | 52.5%            | 100              | 8.9     |
| 21        | F18         | Father's blood from Set #18         | 4969103                    | 699866       | 539790           | 10.9%                                                                                           | 2483642                | 56.1%   | 459289  | 10.4%  | 309906 | 7.0%   | 19412      | 0.4%         | 1157052 | 28.1%   | 4969103     | 56.1%            | 200              | 11.5    |
| 22        | F12         | Father's blood from Set #12         | 1480566                    | 280408       | 386307           | 25.9%                                                                                           | 385004                 | 34.9%   | 130866  | 11.8%  | 59727  | 5.4%   | 7298       | 0.7%         | 521508  | 47.2%   | 1480566     | 34.9%            | 50               | 2.5     |
| 23        | P5          | Placenta from Set #5                | 2787458                    | 127520       | 209373           | 7.5%                                                                                            | 2413377                | 93.6%   | 28983   | 1.0%   | 42941  | 1.7%   | 3744       | 0.1%         | 90012   | 3.5%    | 2413377     | 93.6%            | na               | 28.8    |
| 24        | P6          | Placenta from Set #6                | 2684368                    | 115455       | 181907           | 6.8%                                                                                            | 2378282                | 95.0%   | 22740   | 0.9%   | 22798  | 0.9%   | 4143       | 0.2%         | 75636   | 3.0%    | 2378282     | 95.0%            | na               | 32.7    |
| 25        | P7          | Placenta from Set #7                | 6695605                    | 208600       | 222412           | 3.3%                                                                                            | 6194430                | 95.7%   | 40181   | 0.6%   | 61827  | 1.0%   | 10947      | 0.2%         | 165022  | 2.5%    | 6194430     | 95.7%            | na               | 69.0    |
| 26        | P8          | Placenta from Set #8                | 2283764                    | 103952       | 167804           | 6.2%                                                                                            | 1957614                | 93.4%   | 20130   | 1.0%   | 47976  | 2.3%   | 8656       | 0.4%         | 61640   | 2.9%    | 1957614     | 93.4%            | na               | 26.1    |
| 27        | P9          | Placenta from Set #9                | 2283764                    | 95554        | 228597           | 10.2%                                                                                           | 1879868                | 95.6%   | 16805   | 0.8%   | 27551  | 1.4%   | 6099       | 0.3%         | 57145   | 2.9%    | 1879868     | 95.6%            | na               | 20.7    |
| 28        | P10         | Placenta from Set #10               | 4914855                    | 162188       | 255224           | 5.2%                                                                                            | 4476164                | 95.5%   | 27849   | 0.6%   | 52471  | 1.1%   | 10720      | 0.2%         | 118419  | 2.5%    | 4476164     | 95.5%            | na               | 43.8    |
| 29        | P11         | Placenta from Set #11               | 3639947                    | 128297       | 162793           | 5.4%                                                                                            | 3319417                | 95.5%   | 26530   | 0.8%   | 34122  | 1.0%   | 10466      | 0.3%         | 86163   | 2.7%    | 3319417     | 95.5%            | na               | 51.0    |
| 30        | P12         | Placenta from Set #12               | 4113247                    | 146656       | 222581           | 5.4%                                                                                            | 3716537                | 95.5%   | 26530   | 0.6%   | 38308  | 1.0%   | 7412       | 0.2%         | 106539  | 2.7%    | 3716537     | 95.5%            | na               | 41.7    |
| 31        | C1          | Non-pregnant woman plasma Sample #1 | 2223901                    | 4114000      | 4763014          | 18.3%                                                                                           | 149013                 | 67.8%   | 8936    | 4.1%   | 6969   | 3.2%   | 698        | 0.3%         | 54303   | 2.5%    | 4114000     | 67.8%            | 235              | 7.4     |
| 32        | C2          | Non-pregnant woman plasma Sample #2 | 2223901                    | 4114000      | 4763014          | 18.3%                                                                                           | 149013                 | 67.8%   | 8936    | 4.1%   | 6969   | 3.2%   | 698        | 0.3%         | 54303   | 2.5%    | 4114000     | 67.8%            | 235              | 7.4     |
| 33        | C3          | Non-pregnant woman serum Sample #3  | 2045675                    | 329169       | 565916           | 27.5%                                                                                           | 194526                 | 13.7%   | 95743   | 6.5%   | 30155  | 2.0%   | 6355       | 0.4%         | 1152966 | 77.9%   | 194526      | 13.7%            | 21               | 0.5     |
| 34        | C4          | Non-pregnant woman serum Sample #4  | 1935157                    | 283207       | 580383           | 44.5%                                                                                           | 128434                 | 17.7%   | 86008   | 11.9%  | 48917  | 6.7%   | 4943       | 0.6%         | 445786  | 63.1%   | 128434      | 17.7%            | 19               | 0.5     |
| 35        | C5          | Non-pregnant woman serum Sample #5  | 1289020                    | 297419       | 606391           | 47.2%                                                                                           | 73980                  | 10.9%   | 90451   | 13.3%  | 42333  | 6.2%   | 3919       | 0.6%         | 469880  | 69.0%   | 1289020     | 10.9%            | 9                | 0.3     |

\* other category includes viral miRNAs, piRNAs, non-prototypical doubtful miRNAs, 19-24 oligonucleotide marker used during cDNA library preparation, miscellaneous RNA, repeat masker, sequences that mapped to the genome but have no annotation, sequences that did not map to the genome and have no annotation



## Supplementary Figure 2

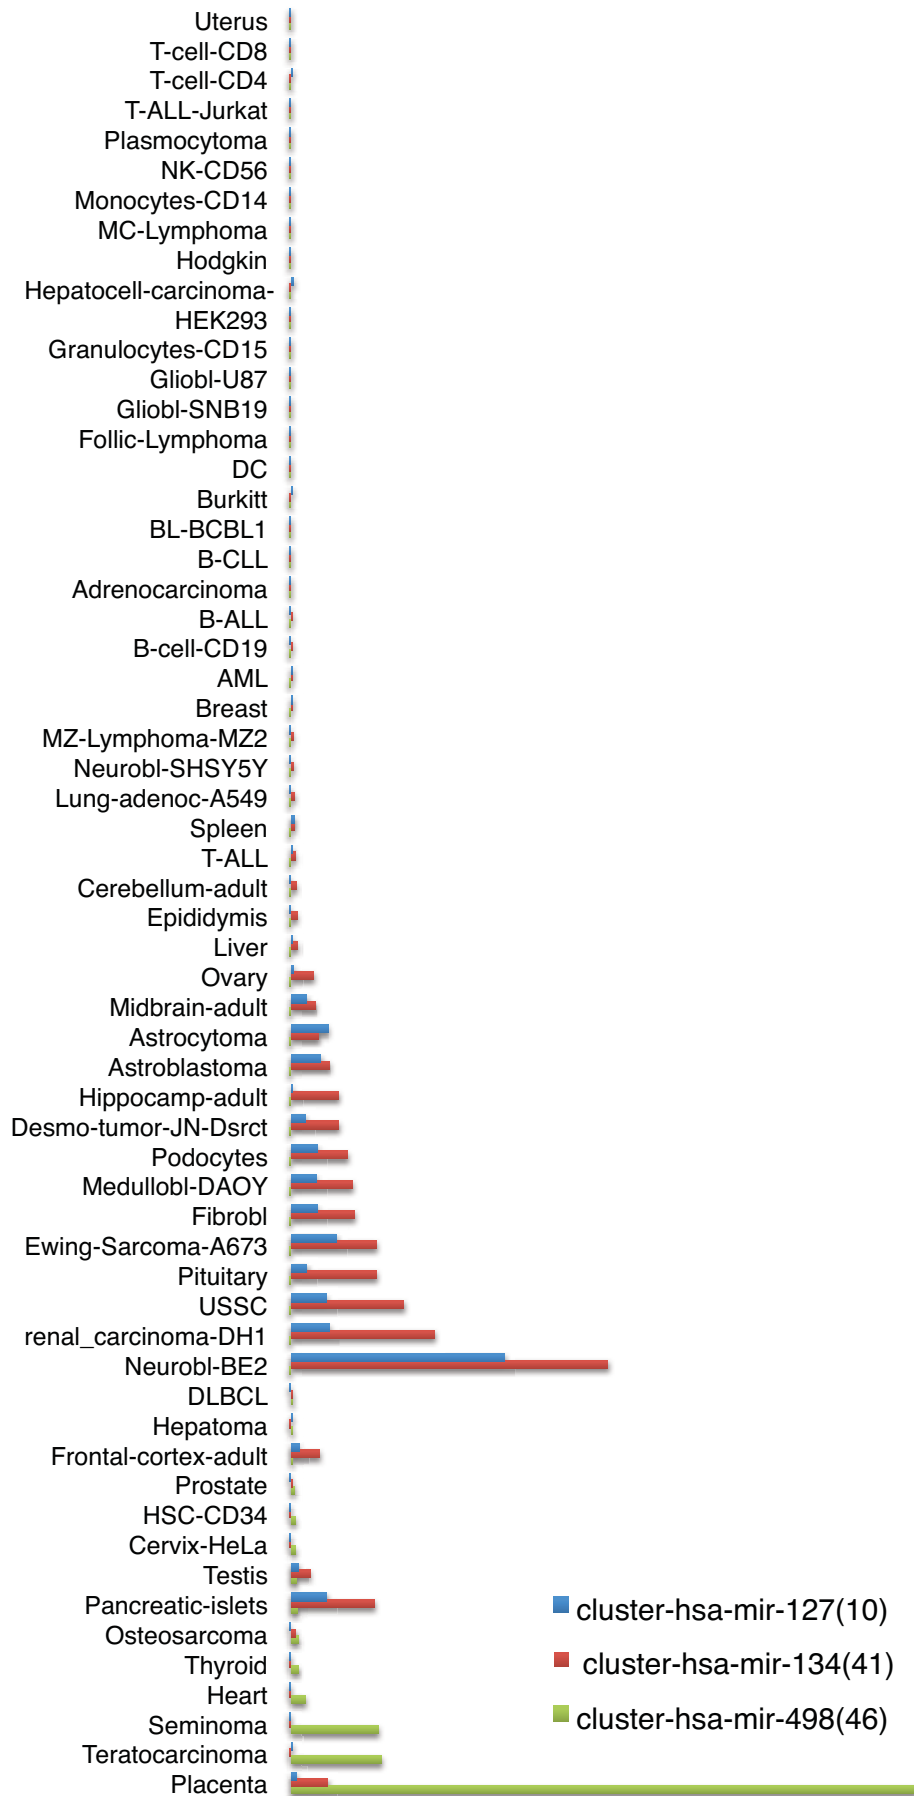

### Supplementary Figure 3

|     | P5 | P6  | P7  | P8 | P48 | P10 | P11 | P12 | B7 | B11 | B6 | B8  | B10 | B12 | M6 | M8 | M10 | M12 | D6  | D8  | D10 | D12 | C3  | C4  | C5  |
|-----|----|-----|-----|----|-----|-----|-----|-----|----|-----|----|-----|-----|-----|----|----|-----|-----|-----|-----|-----|-----|-----|-----|-----|
| P5  | 0  | 16  | 33  | 9  | 10  | 23  | 10  | 12  | 45 | 32  | 24 | 59  | 30  | 27  | 66 | 68 | 55  | 77  | 97  | 94  | 81  | 93  | 91  | 93  | 92  |
| P6  | 16 | 0   | 20  | 13 | 13  | 10  | 16  | 11  | 56 | 44  | 29 | 54  | 20  | 35  | 78 | 80 | 66  | 89  | 109 | 106 | 92  | 105 | 103 | 105 | 104 |
| P7  | 33 | 20  | 0   | 31 | 32  | 14  | 34  | 28  | 74 | 62  | 43 | 55  | 21  | 52  | 96 | 98 | 85  | 108 | 127 | 125 | 111 | 123 | 121 | 123 | 123 |
| P8  | 9  | 13  | 31  | 0  | 9   | 21  | 9   | 11  | 46 | 34  | 24 | 56  | 28  | 27  | 67 | 69 | 56  | 79  | 98  | 96  | 82  | 95  | 92  | 95  | 94  |
| P48 | 10 | 13  | 32  | 9  | 0   | 21  | 7   | 11  | 45 | 32  | 24 | 56  | 28  | 27  | 66 | 68 | 55  | 78  | 97  | 95  | 81  | 94  | 91  | 94  | 93  |
| P10 | 23 | 10  | 14  | 21 | 21  | 0   | 24  | 18  | 64 | 52  | 35 | 53  | 18  | 42  | 86 | 88 | 74  | 98  | 117 | 114 | 100 | 113 | 111 | 113 | 112 |
| P11 | 10 | 16  | 34  | 9  | 7   | 24  | 0   | 12  | 43 | 30  | 26 | 58  | 31  | 27  | 64 | 66 | 53  | 75  | 95  | 92  | 79  | 91  | 89  | 91  | 90  |
| P12 | 12 | 11  | 28  | 11 | 11  | 18  | 12  | 0   | 50 | 38  | 27 | 56  | 25  | 31  | 71 | 73 | 60  | 83  | 102 | 100 | 86  | 99  | 96  | 99  | 98  |
| B7  | 45 | 56  | 74  | 46 | 45  | 64  | 43  | 50  | 0  | 16  | 42 | 76  | 66  | 32  | 28 | 28 | 19  | 37  | 56  | 53  | 39  | 52  | 50  | 52  | 51  |
| B11 | 32 | 44  | 62  | 34 | 32  | 52  | 30  | 38  | 16 | 0   | 33 | 69  | 54  | 24  | 38 | 40 | 28  | 49  | 68  | 65  | 52  | 64  | 62  | 64  | 63  |
| B6  | 24 | 29  | 43  | 24 | 24  | 35  | 26  | 27  | 42 | 33  | 0  | 50  | 32  | 22  | 63 | 64 | 52  | 75  | 94  | 91  | 77  | 89  | 88  | 90  | 89  |
| B8  | 59 | 54  | 55  | 56 | 56  | 53  | 58  | 56  | 76 | 69  | 50 | 0   | 48  | 55  | 97 | 97 | 86  | 106 | 124 | 121 | 106 | 119 | 118 | 119 | 119 |
| B10 | 30 | 20  | 21  | 28 | 28  | 18  | 31  | 25  | 66 | 54  | 32 | 48  | 0   | 42  | 88 | 90 | 76  | 100 | 119 | 117 | 102 | 115 | 113 | 115 | 115 |
| B12 | 27 | 35  | 52  | 27 | 27  | 42  | 27  | 31  | 32 | 24  | 22 | 55  | 42  | 0   | 52 | 52 | 40  | 63  | 83  | 80  | 65  | 78  | 76  | 78  | 78  |
| M6  | 66 | 78  | 96  | 67 | 66  | 86  | 64  | 71  | 28 | 38  | 63 | 97  | 88  | 52  | 0  | 13 | 17  | 19  | 38  | 36  | 25  | 36  | 32  | 36  | 34  |
| M8  | 68 | 80  | 98  | 69 | 68  | 88  | 66  | 73  | 28 | 40  | 64 | 97  | 90  | 52  | 13 | 0  | 19  | 17  | 35  | 33  | 21  | 33  | 29  | 32  | 31  |
| M10 | 55 | 66  | 85  | 56 | 55  | 74  | 53  | 60  | 19 | 28  | 52 | 86  | 76  | 40  | 17 | 19 | 0   | 28  | 48  | 46  | 32  | 45  | 42  | 45  | 44  |
| M12 | 77 | 89  | 108 | 79 | 78  | 98  | 75  | 83  | 37 | 49  | 75 | 106 | 100 | 63  | 19 | 17 | 28  | 0   | 25  | 24  | 17  | 24  | 20  | 23  | 21  |
| D6  | 97 | 109 | 127 | 98 | 97  | 117 | 95  | 102 | 56 | 68  | 94 | 124 | 119 | 83  | 38 | 35 | 48  | 25  | 0   | 12  | 25  | 14  | 15  | 14  | 13  |
| D8  | 94 | 106 | 125 | 96 | 95  | 114 | 92  | 100 | 53 | 65  | 91 | 121 | 117 | 80  | 36 | 33 | 46  | 24  | 12  | 0   | 21  | 11  | 14  | 13  | 12  |
| D10 | 81 | 92  | 111 | 82 | 81  | 100 | 79  | 86  | 39 | 52  | 77 | 106 | 102 | 65  | 25 | 21 | 32  | 17  | 25  | 21  | 0   | 20  | 20  | 20  | 19  |
| D12 | 93 | 105 | 123 | 95 | 94  | 113 | 91  | 99  | 52 | 64  | 89 | 119 | 115 | 78  | 36 | 33 | 45  | 24  | 14  | 11  | 20  | 0   | 14  | 13  | 13  |
| C3  | 91 | 103 | 121 | 92 | 91  | 111 | 89  | 96  | 50 | 62  | 88 | 118 | 113 | 76  | 32 | 29 | 42  | 20  | 15  | 14  | 20  | 14  | 0   | 14  | 12  |
| C4  | 93 | 105 | 123 | 95 | 94  | 113 | 91  | 99  | 52 | 64  | 90 | 119 | 115 | 78  | 36 | 32 | 45  | 23  | 14  | 13  | 20  | 13  | 14  | 0   | 13  |
| C5  | 92 | 104 | 123 | 94 | 93  | 112 | 90  | 98  | 51 | 63  | 89 | 119 | 115 | 78  | 34 | 31 | 44  | 21  | 13  | 12  | 19  | 13  | 12  | 13  | 0   |



### Supplementary Figure 4

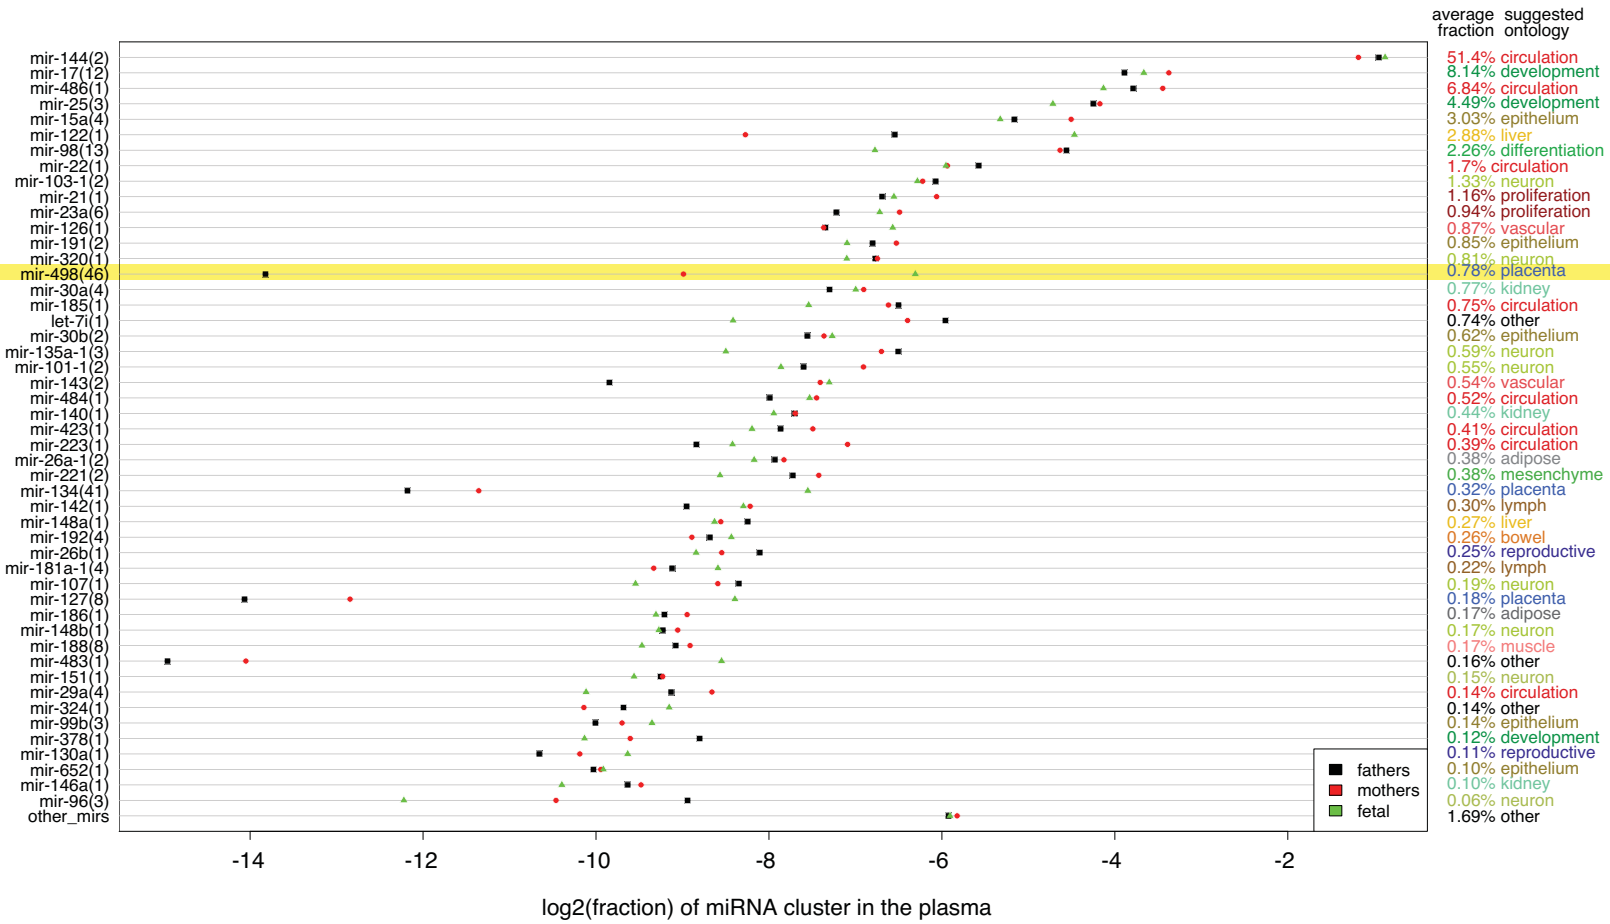

Supplementary Figure 5

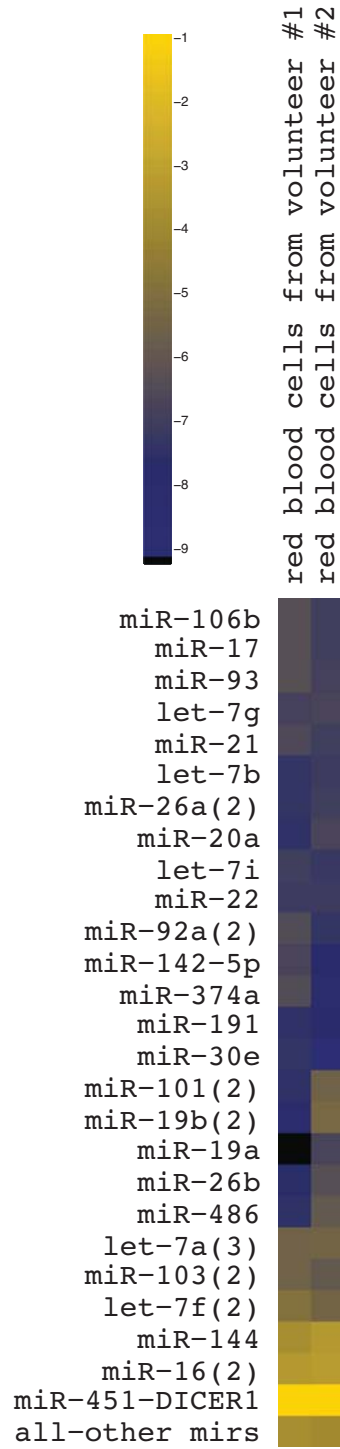

Supplement: 1214046110_sapp.pdf [file 1214046110_sapp.pdf]
